# Supplementary material for: Review article: The growth in compound weather events research in the decade since SREX
Source: Copernicus journal article supplement (doi:10.5194/nhess-2024-182), 2024-09-25
Supplement: Supplementary file 1 [file nhess-2024-182-supplement.pdf]

# Supplementary Information

## Reviewed papers (pg. 1 – 20)

## Hazard combinations (pg. 21 – 33)

Below is a list of the 366 peer reviewed papers that have been catalogued and reviewed, ordered A-Z by first author surname.

### A

Abatzoglou, J. T., Juang, C. S., Williams, A. P., Kolden, C. A., and Westerling, A. L.: Increasing synchronous fire danger in forests of the western United States, *Geophys. Res. Lett.*, 48, e2020GL091377, doi:10.1029/2020GL091377, 2021.

AghaKouchak, A., Chiang, F., Huning, L. S., Love, C. A., Mallakpour, I., Mazdiyasn, O., and Sadegh, M.: Climate extremes and compound hazards in a warming world, *Annu. Rev. Earth Planet. Sci.*, 48, 519–548, doi:10.1146/annurev-earth-071719-055228, 2020.

Ai, P., Yuan, D., and Xiong, C.: Copula-based joint probability analysis of compound floods from rainstorm and typhoon surge: A case study of Jiangsu coastal areas, China, *Sustainability*, 10, 2232, doi:10.3390/su10072232, 2018.

Aihaiti, A., Jiang, Z., Zhu, L., Li, W., and You, Q.: Risk changes of compound temperature and precipitation extremes in China under 1.5°C and 2°C global warming, *Atmos. Res.*, 264, 105838, doi:10.1016/j.atmosres.2021.105838, 2021.

Alaya, M. A. B., Zwiers, F. W., and Zhang, X.: A bivariate approach to estimating the probability of very extreme precipitation events, *Weather Clim. Extrem.*, 30, 100290, doi:10.1016/j.wace.2020.100290, 2020.

Alipour, A., Yarveysi, F., Moftakhari, H., Song, J. Y., and Moradkhani, H.: A multivariate scaling system is essential to characterize the tropical cyclones' risk, *Earth's Future*, 10, e2021EF002635, doi:10.1029/2021EF002635, 2022.

Anderson, D., Rueda, A., Cagigal, L., Antolinez, J. A. A., Mendez, F. J., and Ruggiero, P.: Time-varying emulator for short and long-term analysis of coastal flood hazard potential, *J. Geophys. Res. Oceans*, 124, 9209–9234, doi:10.1029/2019JC015312, 2019.

Apel, H., Martínez Trepát, O., Hung, N. N., Chinh, D. T., Merz, B., and Dung, N. V.: Combined fluvial and pluvial urban flood hazard analysis: concept development and application to Can Tho city, Mekong Delta, Vietnam, *Nat. Hazards Earth Syst. Sci.*, 16, 941–961, doi:10.5194/nhess-16-941-2016, 2016.

Aksha, S. K., Resler, L. M., Juran, L., and Carstensen Jr, L. W.: A geospatial analysis of multi-hazard risk in Dharan, Nepal, *Geomatics Nat. Hazards Risk*, 11, 88–111, doi:10.1080/19475705.2019.1708438, 2020.

### B

Baldwin, J. W., Dessy, J. B., Vecchi, G. A., and Oppenheimer, M.: Temporally compound heat wave events and global warming: An emerging hazard, *Earth's Future*, 7, 411–427, doi:10.1029/2018EF001139, 2019.

Ballarin, A. S., Barros, G. L., Cabrera, M. C., and Wendland, E. C.: A copula-based drought assessment framework considering global simulation models, *J. Hydrol. Reg. Stud.*, 38, 100970, doi:10.1016/j.ejrh.2021.100970, 2021.

Ban, J., Lu, K., Wang, Q., and Li, T.: Climate change will amplify the inequitable exposure to compound heatwave and ozone pollution, *One Earth*, 5, 677–686, doi:10.1016/j.oneear.2022.05.002, 2022.

Baradaranshoraka, M., Pinelli, J. P., Gurley, K., Peng, X., and Zhao, M.: Hurricane wind versus storm surge damage in the context of a risk prediction model, *J. Struct. Eng.*, 143, 04017103, doi:10.1061/(ASCE)ST.1943-541X.0001790, 2017.

Bastos, A., Ciais, P., Friedlingstein, P., Sitch, S., Pongratz, J., Fan, L., and Zaehle, S.: Direct and seasonal legacy effects of the 2018 heat wave and drought on European ecosystem productivity, *Sci. Adv.*, 6, eaba2724, doi:10.1126/sciadv.aba2724, 2020.

- Bastos, A., Orth, R., Reichstein, M., Ciais, P., Viovy, N., Zaehle, S., and Sitch, S.: Vulnerability of European ecosystems to two compound dry and hot summers in 2018 and 2019, *Earth Syst. Dynam.*, 12, 1015–1035, doi:10.5194/esd-12-1015-2021, 2021.
- Ben-Ari, T., Boé, J., Ciais, P., Lecerf, R., Van der Velde, M., and Makowski, D.: Causes and implications of the unforeseen 2016 extreme yield loss in the breadbasket of France, *Nat. Commun.*, 9, 1627, doi:10.1038/s41467-018-04087-x, 2018.
- Berghuijs, W. R., Allen, S. T., Harrigan, S., and Kirchner, J. W.: Growing spatial scales of synchronous river flooding in Europe, *Geophys. Res. Lett.*, 46, 1423–1428, doi:10.1029/2018GL081883, 2019.
- Bengtsson, L.: Probability of combined high sea levels and large rains in Malmö, Sweden, southern Öresund, *Hydrol. Process.*, 30, 3172–3183, doi:10.1002/hyp.10844, 2016.
- Bennett, K. E., Talsma, C., and Boero, R.: Concurrent changes in extreme hydroclimate events in the Colorado River Basin, *Water*, 13, 978, doi:10.3390/w13070978, 2021.
- Bevacqua, E., Maraun, D., Hobæk Haff, I., Widmann, M., and Vrac, M.: Multivariate statistical modelling of compound events via pair-copula constructions: analysis of floods in Ravenna (Italy), *Hydrol. Earth Syst. Sci.*, 21, 2701–2723, doi:10.5194/hess-21-2701-2017, 2017.
- Bevacqua, E., Maraun, D., Voudoukas, M. I., Voukouvalas, E., Vrac, M., Mentaschi, L., and Widmann, M.: Higher probability of compound flooding from precipitation and storm surge in Europe under anthropogenic climate change, *Sci. Adv.*, 5, eaaw5531, doi:10.1126/sciadv.aaw5531, 2019.
- Bevacqua, E., Zappa, G., and Shepherd, T. G.: Shorter cyclone clusters modulate changes in European wintertime precipitation extremes, *Environ. Res. Lett.*, 15, 124005, doi:10.1088/1748-9326/abb507, 2020.
- Bevacqua, E., Voudoukas, M. I., Zappa, G., Hodges, K., Shepherd, T. G., Maraun, D., and Feyen, L.: More meteorological events that drive compound coastal flooding are projected under climate change, *Commun. Earth Environ.*, 1, 47, doi:10.1038/s43247-020-00044-z, 2020.
- Bevacqua, E., De Michele, C., Manning, C., Couasnon, A., Ribeiro, A. F., Ramos, A. M., and Zscheischler, J.: Guidelines for studying diverse types of compound weather and climate events, *Earth's Future*, 9, e2021EF002340, doi:10.1029/2021EF002340, 2021.
- Bevacqua, E., Shepherd, T. G., Watson, P. A., Sparrow, S., Wallom, D., and Mitchell, D.: Larger spatial footprint of wintertime total precipitation extremes in a warmer climate, *Geophys. Res. Lett.*, 48, e2020GL091990, doi:10.1029/2020GL091990, 2021.
- Bevacqua, E., Zappa, G., Lehner, F., and Zscheischler, J.: Precipitation trends determine future occurrences of compound hot–dry events, *Nat. Clim. Change*, 12, 350–355, doi.org/10.1038/s41558-022-01309-5, 2022.
- Bezak, N., and Mikoš, M.: Changes in the compound drought and extreme heat occurrence in the 1961–2018 period at the European scale, *Water*, 12, 3543, doi:10.3390/w12123543, 2020.
- Bilskie, M. V., Zhao, H., Resio, D., Atkinson, J., Cobell, Z., and Hagen, S. C.: Enhancing flood hazard assessments in coastal Louisiana through coupled hydrologic and surge processes, *Front. Water*, 3, 609231, doi:10.3389/frwa.2021.609231, 2021.
- Bonekamp, P. N. J., Wanders, N., van der Wiel, K., Lutz, A. F., and Immerzeel, W. W.: Using large ensemble modelling to derive future changes in mountain specific climate indicators in a 2 and 3°C warmer world in High Mountain Asia, *Int. J. Climatol.*, 41, E964–E979, doi:10.1002/joc.6834, 2021.
- Boult, V. L., Black, E., Abdillahi, H. S., Bailey, M., Harris, C., Kilavi, M., and Todd, M. C.: Towards drought impact-based forecasting in a multi-hazard context, *Clim. Risk Manag.*, 35, 100402, doi:10.1016/j.crm.2022.100402, 2022.
- Breshears, D. D., Fontaine, J. B., Ruthrof, K. X., Field, J. P., Feng, X., Burger, J. R., and Hardy, G. E. S. J.: Underappreciated plant vulnerabilities to heat waves, *New Phytol.*, 231, 32–39, doi:10.1111/nph.17373, 2021.
- Brunner, M. I., Gilleland, E., and Wood, A. W.: Space–time dependence of compound hot–dry events in the United States: assessment using a multi-site multi-variable weather generator, *Earth Syst. Dynam.*, 12, 621–634, doi:10.5194/esd-12-621-2021, 2021.

## C

- Camici, S., Crow, W. T., and Brocca, L.: Recent advances in remote sensing of precipitation and soil moisture products for riverine flood prediction, in: *Extreme Hydroclimatic Events and Multivariate Hazards in a Changing Environment*, 247–266, DOI:10.1016/B978-0-12-814899-0.00010-9, 2019.
- Camus, P., Haigh, I. D., Nasr, A. A., Wahl, T., Darby, S. E., and Nicholls, R. J.: Regional analysis of multivariate compound coastal flooding potential around Europe and environs: sensitivity analysis and spatial patterns, *Nat. Hazards Earth Syst. Sci.*, 21, 2021–2040, doi:10.5194/nhess-21-2021-2021, 2021.
- Camus, P., Haigh, I. D., Wahl, T., Nasr, A. A., Méndez, F., Darby, S. E., and Nicholls, R. J.: Daily synoptic conditions associated with occurrences of compound events in estuaries along North Atlantic coastlines, *Int. J. Climatol.*, 42, 5694–5713, DOI:10.1002/joc.7556, 2022.
- Catto, J. L., and Dowdy, A.: Understanding compound hazards from a weather system perspective, *Weather Clim. Extrem.*, 32, 100313, doi:10.1016/j.wace.2021.100313, 2021.
- Chen, L., Chen, X., Cheng, L., Zhou, P., and Liu, Z.: Compound hot droughts over China: Identification, risk patterns and variations, *Atmos. Res.*, 227, 210–219, DOI:10.1016/j.atmosres.2019.05.009, 2019.
- Chen, Y., Zhou, B., Zhai, P., and Moufouma-Okia, W.: Half-a-degree matters for reducing and delaying global land exposure to combined daytime-nighttime hot extremes, *Earth's Future*, 7, 953–966, doi.org/10.1029/2019EF001202, 2019.
- Chen, G., Wan, Y., Li, Y., Pei, X., and Huang, D.: Time-dependent damage mechanism of rock deterioration under freeze–thaw cycles linked to alpine hazards, *Nat. Hazards*, 108, 635–660, doi:10.1007/s11069-021-04707-2, 2021.
- Chen, Y., Liao, Z., Shi, Y., Tian, Y., and Zhai, P.: Detectable increases in sequential flood–heatwave events across China during 1961–2018, *Geophys. Res. Lett.*, 48, e2021GL092549, doi:10.1029/2021GL092549, 2021.
- Cheng, L., Hoerling, M., Liu, Z., and Eischeid, J.: Physical understanding of human-induced changes in US hot droughts using equilibrium climate simulations, *J. Clim.*, 32, 4431–4443, doi:10.1175/JCLI-D-18-0812.1, 2019.
- Chiang, F., Greve, P., Mazdiyasi, O., Wada, Y., and AghaKouchak, A.: Intensified likelihood of concurrent warm and dry months attributed to anthropogenic climate change, *Water Resour. Res.*, 58, e2021WR030411, doi:10.1029/2021WR030411, 2022.
- Collins, B.: Frequency of compound hot–dry weather extremes has significantly increased in Australia since 1889, *J. Agron. Crop Sci.*, 208, 941–955, doi:10.1111/jac.12577, 2022.
- Couasnon, A., Sebastian, A., and Morales-Nápoles, O.: A copula-based Bayesian network for modeling compound flood hazard from riverine and coastal interactions at the catchment scale: An application to the Houston Ship Channel, Texas, *Water*, 10, 1190, doi:10.3390/w10091190, 2018.
- Couasnon, A., Eilander, D., Muis, S., Veldkamp, T. I., Haigh, I. D., Wahl, T., and Ward, P. J.: Measuring compound flood potential from river discharge and storm surge extremes at the global scale, *Nat. Hazards Earth Syst. Sci.*, 20, 489–504, doi:10.5194/nhess-20-489-2020, 2020.
- Cowan, T., Wheeler, M. C., de Burgh-Day, C., Nguyen, H., and Cobon, D.: Multi-week prediction of livestock chill conditions associated with the northwest Queensland floods of February 2019, *Sci. Rep.*, 12, 5907, doi:10.1038/s41598-022-10007-1, 2022.
- Curtis, S., DePolt, K., Kruse, J., Mukherji, A., Helgeson, J., Ghosh, A., and Van Wagoner, P.: Spatially compounded surge events: an example from hurricanes Matthew and Florence, *Nat. Hazards Earth Syst. Sci.*, 21, 1759–1767, doi:10.5194/nhess-21-1759-2021, 2021.

## D

- Dabhi, H., Rotach, M. W., Dubrovský, M., and Oberguggenberger, M.: Evaluation of a stochastic weather generator in simulating univariate and multivariate climate extremes in different climate zones across Europe, *Meteorol. Z.*, 30, 127–151, DOI:10.1127/metz/2020/1021, 2021.
- Das, J., Manikanta, V., and Umamahesh, N. V.: Population exposure to compound extreme events in India under different emission and population scenarios, *Sci. Total Environ.*, 806, 150424, DOI:10.1016/j.scitotenv.2021.150424, 2022.

Deidda, C., Rahimi, L., and De Michele, C.: Causes of dependence between extreme floods, *Environ. Res. Lett.*, 16, 084002, doi:10.1088/1748-9326/ac07c3, 2021.

De Luca, P., Hillier, J. K., Wilby, R. L., Quinn, N. W., and Harrigan, S.: Extreme multi-basin flooding linked with extra-tropical cyclones, *Environ. Res. Lett.*, 12, 114009, DOI:10.1088/1748-9326/aa868e, 2017.

De Luca, P., Harpham, C., Wilby, R. L., Hillier, J. K., Franzke, C. L., and Leckebusch, G. C.: Past and projected weather pattern persistence with associated multi-hazards in the British Isles, *Atmosphere*, 10, 577, doi.org/10.3390/atmos10100577, 2019.

De Luca, P., Messori, G., Wilby, R. L., Mazzoleni, M., and Di Baldassarre, G.: Concurrent wet and dry hydrological extremes at the global scale, *Earth Syst. Dynam.*, 11, 251–266, doi:10.5194/esd-11-251-2020, 2020.

De Luca, P., Messori, G., Faranda, D., Ward, P. J., and Coumou, D.: Compound warm–dry and cold–wet events over the Mediterranean, *Earth Syst. Dynam.*, 11, 793–805, doi:10.5194/esd-11-793-2020, 2020.

De Michele, C., Meroni, V., Rahimi, L., Deidda, C., and Ghezzi, A.: Dependence types in a binarized precipitation network, *Geophys. Res. Lett.*, 47, e2020GL090196, doi:10.1029/2020GL090196, 2020.

d'Errico, M., Pons, F., Yiou, P., Tao, S., Nardini, C., Lunkeit, F., and Faranda, D.: Present and future synoptic circulation patterns associated with cold and snowy spells over Italy, *Earth Syst. Dynam.*, 13, 961–992, doi:10.5194/esd-13-961-2022, 2022.

Dippy, R.: Professionalism: certification for emergency management leaders, *Aust. J. Emerg. Manag.*, 35, 56–60, 2020.

Dowdy, A. J., and Pepler, A.: Pyroconvection risk in Australia: Climatological changes in atmospheric stability and surface fire weather conditions, *Geophys. Res. Lett.*, 45, 2005–2013, doi:10.1002/2017GL076654, 2018.

Druckenbrod, D. L., Martin-Benito, D., Orwig, D. A., Pederson, N., Poulter, B., Renwick, K. M., and Shugart, H. H.: Redefining temperate forest responses to climate and disturbance in the eastern United States: New insights at the mesoscale, *Glob. Ecol. Biogeogr.*, 28, 557–575, DOI:10.1111/geb.12876, 2019.

Dykstra, S. L., and Dzwonkowski, B.: The role of intensifying precipitation on coastal river flooding and compound river-storm surge events, Northeast Gulf of Mexico, *Water Resour. Res.*, 57, e2020WR029363, doi:10.1029/2020WR029363, 2021.

Dzwonkowski, B., Fournier, S., Lockridge, G., Coogan, J., Liu, Z., and Park, K.: Cascading weather events amplify the coastal thermal conditions prior to the shelf transit of Hurricane Sally (2020), *J. Geophys. Res. Oceans*, 126, e2021JC017957, doi:10.1029/2021JC017957, 2021.

## E

Ebi, K. L., Vanos, J., Baldwin, J. W., Bell, J. E., Hondula, D. M., Errett, N. A., and Berry, P.: Extreme weather and climate change: population health and health system implications, *Annu. Rev. Public Health*, 42, 293–315, doi:10.1146/annurev-publhealth-012420-105026, 2021.

Eilander, D., Couasnon, A., Ikeuchi, H., Muis, S., Yamazaki, D., Winsemius, H. C., and Ward, P. J.: The effect of surge on riverine flood hazard and impact in deltas globally, *Environ. Res. Lett.*, 15, 104007, DOI 10.1088/1748-9326/ab8ca6, 2020.

El-Madany, T. S., Carrara, A., Martín, M. P., Moreno, G., Kolle, O., Pacheco-Labrador, J., and Migliavacca, M.: Drought and heatwave impacts on semi-arid ecosystems' carbon fluxes along a precipitation gradient, *Philos. Trans. R. Soc. B*, 375, 20190519, doi:10.1098/rstb.2019.0519, 2020.

English, E. C., Friedland, C. J., and Orooji, F.: Combined flood and wind mitigation for hurricane damage prevention: Case for amphibious construction, *J. Struct. Eng.*, 143, 06017001, DOI:10.1061/(ASCE)ST.1943-541X.0001750, 2017.

Ermitão, T., Gouveia, C. M., Bastos, A., and Russo, A. C.: Vegetation productivity losses linked to Mediterranean hot and dry events, *Remote Sens.*, 13, 4010, doi:10.3390/rs13194010, 2021.

## F

Fakhruddin, B., Kintada, K., and Hassan, Q.: Understanding hazards: probabilistic cyclone modelling for disaster risk to the Eastern Coast in Bangladesh, *Prog. Disaster Sci.*, 13, doi:10.1016/j.pdisas.2022.100216, 2022.

Fan, Y. R., Yu, L., Shi, X., and Duan, Q. Y.: Tracing uncertainty contributors in the multi-hazard risk analysis for compound extremes, *Earth's Future*, 9, doi:10.1029/2021EF002280, 2021.

Fang, J., Wahl, T., Fang, J., Sun, X., Kong, F., and Liu, M.: Compound flood potential from storm surge and heavy precipitation in coastal China: dependence, drivers, and impacts, *Hydrol. Earth Syst. Sci.*, 25, 4403–4416, doi:10.5194/hess-25-4403-2021, 2021.

Feng, S., Hao, Z., Zhang, X., and Hao, F.: Probabilistic evaluation of the impact of compound dry-hot events on global maize yields, *Sci. Total Environ.*, 689, 1228–1234, doi:10.1016/j.scitotenv.2019.06.373, 2019.

Feng, S., and Hao, Z.: Quantifying likelihoods of extreme occurrences causing maize yield reduction at the global scale, *Sci. Total Environ.*, 704, doi:10.1016/j.scitotenv.2019.135250, 2020.

Feng, S., Wu, X., Hao, Z., Hao, Y., Zhang, X., and Hao, F.: A database for characteristics and variations of global compound dry and hot events, *Weather Clim. Extrem.*, 30, doi:10.1016/j.wace.2020.100299, 2020.

Feng, S., Hao, Z., Zhang, X., and Hao, F.: Changes in climate-crop yield relationships affect risks of crop yield reduction, *Agric. For. Meteorol.*, 304, doi:10.1016/j.agrformet.2021.108401, 2021.

Feng, S., and Hao, Z.: Quantitative contribution of ENSO to precipitation-temperature dependence and associated compound dry and hot events, *Atmos. Res.*, 260, doi:10.1016/j.atmosres.2021.105695, 2021.

Feng, S., Hao, Z., Wu, X., Zhang, X., and Hao, F.: A multi-index evaluation of changes in compound dry and hot events of global maize areas, *J. Hydrol.*, 602, doi:10.1016/j.jhydrol.2021.126728, 2021.

Fish, M. A., Done, J. M., Swain, D. L., Wilson, A. M., Michaelis, A. C., Gibson, P. B., and Ralph, F. M.: Large-scale environments of successive atmospheric river events leading to compound precipitation extremes in California, *J. Clim.*, 35, 1515–1536, doi:10.1175/JCLI-D-21-0168.1, 2022.

Flach, M., Sippel, S., Gans, F., Bastos, A., Brenning, A., Reichstein, M., and Mahecha, M. D.: Contrasting biosphere responses to hydrometeorological extremes: revisiting the 2010 western Russian heatwave, *Biogeosciences*, 15, 6067–6085, doi:10.5194/bg-15-6067-2018, 2018.

Flach, M., Brenning, A., Gans, F., Reichstein, M., Sippel, S., and Mahecha, M. D.: Vegetation modulates the impact of climate extremes on gross primary production, *Biogeosciences Discuss.*, doi:10.5194/bg-18-39-2021, 2020.

## G

Ganguli, P., Paprotny, D., Hasan, M., Güntner, A., and Merz, B.: Projected changes in compound flood hazard from riverine and coastal floods in northwestern Europe, *Earth's Future*, 8, doi.org/10.1029/2020EF001752, 2020. □ Gallina, V., Torresan, S., Critto, A., Sperotto, A., Glade, T., and Marcomini, A.: A review of multi-risk methodologies for natural hazards: consequences and challenges for a climate change impact assessment, *J. Environ. Manage.*, 168, 123–132, doi.org/10.1016/j.jenvman.2015.11.011, 2016.

Ganguli, P., and Merz, B.: Trends in compound flooding in northwestern Europe during 1901–2014, *Geophys. Res. Lett.*, 46, 10810–10820, DOI:10.1029/2019GL084220, 2019.

Ganguli, P., and Merz, B.: Extreme coastal water levels exacerbate fluvial flood hazards in Northwestern Europe, *Sci. Rep.*, 9, 13165, doi.org/10.1038/s41598-019-49822-6, 2019.

Gao, Y., Zhang, J., Yan, F., Leung, L. R., Luo, K., Zhang, Y., and Bell, M. L.: Nonlinear effect of compound extreme weather events on ozone formation over the United States, *Weather Clim. Extrem.*, 30, 100285, doi.org/10.1016/j.wace.2020.100285, 2020.

Garry, F. K., Bernie, D. J., Davie, J. C., and Pope, E. C.: Future climate risk to UK agriculture from compound events, *Clim. Risk Manage.*, 32, 100282, doi.org/10.1016/j.crm.2021.100282, 2021.

Gazol, A., and Camarero, J. J.: Compound climate events increase tree drought mortality across European forests, *Sci. Total Environ.*, 816, 151604, doi.org/10.1016/j.scitotenv.2021.151604, 2022.

Geirinhas, J. L., Russo, A., Libonati, R., Sousa, P. M., Miralles, D. G., and Trigo, R. M.: Recent increasing frequency of compound summer drought and heatwaves in Southeast Brazil, *Environ. Res. Lett.*, 16, 034036, DOI 10.1088/1748-9326/abe0eb, 2021.

Ghanbari, M., Arabi, M., Kao, S. C., Obeysekera, J., and Sweet, W.: Climate change and changes in compound coastal-riverine flooding hazard along the US coasts, *Earth's Future*, 9, doi.org/10.1029/2021EF002055, 2021.

Gill, J. C., and Malamud, B. D.: Reviewing and visualizing the interactions of natural hazards, *Rev. Geophys.*, 52, 680–722, doi.org/10.1002/2013RG000445, 2014.

Goodess, C. M.: How is the frequency, location and severity of extreme events likely to change up to 2060?, *Environ. Sci. Policy*, 27, S4–S14, doi.org/10.1016/j.envsci.2012.04.001, 2013.

Gori, A., Lin, N., and Smith, J.: Assessing compound flooding from landfalling tropical cyclones on the North Carolina coast, *Water Resour. Res.*, 56, doi.org/10.1029/2019WR026788, 2020.

Gori, A., Lin, N., and Xi, D.: Tropical cyclone compound flood hazard assessment: from investigating drivers to quantifying extreme water levels, *Earth's Future*, 8, doi.org/10.1029/2020EF001660, 2020.

Green, A., and Chmutina, K.: Building climate resilience of UK's rail network through a multihazard approach, *Proc. Inst. Civ. Eng.-Eng. Sustain.*, 172, 450–458, doi.org/10.1680/jensu.18.00031, 2019.

Grip, I. L., Haghightafshar, S., and Aspegren, H.: A methodology for the assessment of compound sea level and rainfall impact on urban drainage networks in a coastal city under climate change, *City Environ. Interact.*, 12, doi.org/10.1016/j.cacint.2021.100074, 2021.

Gruber, N., Boyd, P. W., Frölicher, T. L., and Vogt, M.: Biogeochemical extremes and compound events in the ocean, *Nature*, 600, 395–407, doi.org/10.1038/s41586-021-03981-7, 2021.

Gu, L., Chen, J., Yin, J., Slater, L. J., Wang, H. M., Guo, Q., and Zhao, T.: Global increases in compound flood-hot extreme hazards under climate warming, *Geophys. Res. Lett.*, 49, doi.org/10.1029/2022GL097726, 2022.

Guo, Y., Lu, X., Zhang, J., Li, K., Wang, R., Rong, G., and Tong, Z.: Joint analysis of drought and heat events during maize (*Zea mays* L.) growth periods using copula and cloud models: a case study of Songliao Plain, *Agric. Water Manag.*, 259, doi.org/10.1016/j.agwat.2021.107238, 2022.

## H

Hamed, R., Van Loon, A. F., Aerts, J., and Coumou, D.: Impacts of compound hot–dry extremes on US soybean yields, *Earth Syst. Dynam.*, 12, 1371–1391, doi:10.5194/esd-12-1371-2021, 2021.

Handmer, J., Hochrainer-Stigler, S., Schinko, T., Gaupp, F., and Mechler, R.: The Australian wildfires from a systems dependency perspective, *Environ. Res. Lett.*, 15, DOI 10.1088/1748-9326/abc0bc, 2020.

Hao, Z., Hao, F., Singh, V. P., and Zhang, X.: Quantifying the relationship between compound dry and hot events and El Niño–southern Oscillation (ENSO) at the global scale, *J. Hydrol.*, 567, 332–338, doi.org/10.1016/j.jhydrol.2018.10.022, 2018.

Hao, Z., Hao, F., Singh, V. P., and Zhang, X.: Statistical prediction of the severity of compound dry-hot events based on El Niño–Southern Oscillation, *J. Hydrol.*, 572, 243–250, doi.org/10.1016/j.jhydrol.2019.03.001, 2019.

Hao, Z., Hao, F., Xia, Y., Singh, V. P., and Zhang, X.: A monitoring and prediction system for compound dry and hot events, *Environ. Res. Lett.*, 14, 114034, DOI 10.1088/1748-9326/ab4df5, 2019.

Hao, Z., and Singh, V. P.: Compound events under global warming: a dependence perspective, *J. Hydrol. Eng.*, 25, , 2020.

Hao, Z., Zhang, X., Singh, V. P., and Hao, F.: Joint modeling of precipitation and temperature under influences of El Niño Southern Oscillation for compound event evaluation and prediction, *Atmos. Res.*, 245, doi.org/10.1016/j.atmosres.2020.105090, 2020.

Hao, Y., Hao, Z., Feng, S., Zhang, X., and Hao, F.: Response of vegetation to El Niño–Southern Oscillation (ENSO) via compound dry and hot events in southern Africa, *Glob. Planet. Change*, 195, doi.org/10.1016/j.gloplacha.2020.103358, 2020.

Hao, Y., Hao, Z., Fu, Y., Feng, S., Zhang, X., Wu, X., and Hao, F.: Probabilistic assessments of the impacts of compound dry and hot events on global vegetation during growing seasons, *Environ. Res. Lett.*, 16, DOI 10.1088/1748-9326/ac1015, 2021.

Hao, Y., Hao, Z., Feng, S., Wu, X., Zhang, X., and Hao, F.: Categorical prediction of compound dry and hot events in northeast China based on large-scale climate signals, *J. Hydrol.*, 602, doi.org/10.1016/j.jhydrol.2021.126729, 2021.

Harrison, L. M., Coulthard, T. J., Robins, P. E., and Lewis, M. J.: Sensitivity of estuaries to compound flooding, *Estuaries Coasts*, 45, 1250–1269, doi.org/10.1007/s12237-021-00996-1, 2022.

He, X., and Sheffield, J.: Lagged compound occurrence of droughts and pluvials globally over the past seven decades, *Geophys. Res. Lett.*, 47, doi.org/10.1029/2020GL087924, 2020.

He, Y., Fang, J., Xu, W., and Shi, P.: Substantial increase of compound droughts and heatwaves in wheat growing seasons worldwide, *Int. J. Climatol.*, 42, 5038–5054, doi.org/10.1002/joc.7518, 2022.

He, Y., Hu, X., Xu, W., Fang, J., and Shi, P.: Increased probability and severity of compound dry and hot growing seasons over world's major croplands, *Sci. Total Environ.*, 824, doi.org/10.1016/j.scitotenv.2022.153885, 2022.

Hendry, A., Haigh, I. D., Nicholls, R. J., Winter, H., Neal, R., Wahl, T., and Darby, S. E.: Assessing the characteristics and drivers of compound flooding events around the UK coast, *Hydrol. Earth Syst. Sci.*, 23, 3117–3139, doi.org/10.5194/hess-23-3117-2019, 2019.

Hénin, R., Ramos, A. M., Pinto, J. G., and Liberato, M. L.: A ranking of concurrent precipitation and wind events for the Iberian Peninsula, *Int. J. Climatol.*, 41, 1421–1437, DOI:10.1002/joc.6829, 2021.

Herdman, L., Erikson, L., and Barnard, P.: Storm surge propagation and flooding in small tidal rivers during events of mixed coastal and fluvial influence, *J. Mar. Sci. Eng.*, 6, 158, doi.org/10.3390/jmse6040158, 2018.

Hertig, E., Russo, A., and Trigo, R. M.: Heat and ozone pollution waves in central and south Europe—characteristics, weather types, and association with mortality, *Atmosphere*, 11, 1271, doi:10.3390/atmos11121271, 2020.

Hillier, J. K., Macdonald, N., Leckebusch, G. C., and Stavrinides, A.: Interactions between apparently ‘primary’ weather-driven hazards and their cost, *Environ. Res. Lett.*, 10, DOI 10.1088/1748-9326/10/10/104003, 2015.

Hillier, J. K., Matthews, T., Wilby, R. L., and Murphy, C.: Multi-hazard dependencies can increase or decrease risk, *Nat. Clim. Change*, 10, 595–598, DOI:10.1038/s41558-020-0832-y, 2020.

Hillier, J. K., and Dixon, R. S.: Seasonal impact-based mapping of compound hazards, *Environ. Res. Lett.*, 15, DOI 10.1088/1748-9326/abbc3d, 2020.

Hoover, D. L., Hajek, O. L., Smith, M. D., Wilkins, K., Slette, I. J., and Knapp, A. K.: Compound hydroclimatic extremes in a semi-arid grassland: drought, deluge, and the carbon cycle, *Glob. Change Biol.*, 28, 2611–2621, doi.org/10.1111/gcb.16081, 2022.

Horton, R. M., Mankin, J. S., Lesk, C., Coffel, E., and Raymond, C.: A review of recent advances in research on extreme heat events, *Curr. Clim. Change Rep.*, 2, 242–259, doi:10.1007/s40641-016-0042-x, 2016.

Housego, R., Raubenheimer, B., Elgar, S., Cross, S., Legner, C., and Ryan, D.: Coastal flooding generated by ocean wave- and surge-driven groundwater fluctuations on a sandy barrier island, *J. Hydrol.*, 603, doi.org/10.1016/j.jhydrol.2021.126920, 2021.

## I

Iadanza, C., Trigila, A., and Napolitano, F.: Identification and characterization of rainfall events responsible for triggering of debris flows and shallow landslides, *J. Hydrol.*, 541, 230–245, doi:10.1016/j.jhydrol.2016.01.018, 2016.

Ionita, M., and Nagavciuc, V.: Changes in drought features at the European level over the last 120 years, *Nat. Hazards Earth Syst. Sci.*, 21, 1685–1701, doi:10.5194/nhess-21-1685-2021, 2021.

## J

Jahn, S., and Hertig, E.: Using clustering, statistical modeling, and climate change projections to analyze recent and future region-specific compound ozone and temperature burden over Europe, *GeoHealth*, 6, e2021GH000561, doi:10.1029/2021GH000561, 2022.

Jacobs, L., Maes, J., Mertens, K., Sekajugo, J., Thiery, W., van Lipzig, N., and Dewitte, O.: Reconstruction of a flash flood event through a multi-hazard approach: focus on the Rwenzori Mountains, Uganda, *Nat. Hazards*, 84, 851–876, doi:10.1007/s11069-016-2458-y, 2016.

Jane, R., Wahl, T., Santos, V. M., Misra, S. K., and White, K. D.: Assessing the potential for compound storm surge and extreme river discharge events at the catchment scale with statistical models: sensitivity analysis and recommendations for best practice, *J. Hydrol. Eng.*, 27, 04022001, doi:10.1061/(ASCE)HE.1943-5584.0002154, 2022.

Jarvis, C., Darbyshire, R., Eckard, R., Goodwin, I., and Barlow, E.: Influence of El Niño-Southern Oscillation and the Indian Ocean Dipole on winegrape maturity in Australia, *Agric. For. Meteorol.*, 248, 502–510, doi:10.1016/j.agrformet.2017.10.021, 2018.

Jeong, D. I., Sushama, L., Vieira, M. J., and Koenig, K. A.: Projected changes to extreme ice loads for overhead transmission lines across Canada, *Sustain. Cities Soc.*, 39, 639–649, doi:10.1016/j.scs.2018.03.017, 2018.

Jiang, L., Chen, Y. D., Li, J., and Liu, C.: Amplification of soil moisture deficit and high temperature in a drought-heatwave co-occurrence in southwestern China, *Nat. Hazards*, 1–20, doi:10.1007/s11069-021-05071-3, 2022.

## K

Kapwata, T., Wright, C. Y., du Preez, D. J., Kunene, Z., Mathee, A., Ikeda, T., and Blesic, S.: Exploring rural hospital admissions for diarrhoeal disease, malaria, pneumonia, and asthma in relation to temperature, rainfall and air pollution using wavelet transform analysis, *Sci. Total Environ.*, 791, 148307, doi:10.1016/j.scitotenv.2021.148307, 2021.

Kemter, M., Fischer, M., Luna, L. V., Schönfeldt, E., Vogel, J., Banerjee, A., and Thonicke, K.: Cascading hazards in the aftermath of Australia's 2019/2020 Black Summer wildfires, *Earth's Future*, 9, e2020EF001884, doi:10.1029/2020EF001884, 2021.

Khanal, S., Ridder, N., de Vries, H., Terink, W., and van den Hurk, B.: Storm surge and extreme river discharge: a compound event analysis using ensemble impact modelling, *Front. Earth Sci.*, 7, 224, doi:10.3389/feart.2019.00224, 2019.

Khanal, S., Lutz, A. F., Immerzeel, W. W., de Vries, H., Wanders, N., and van den Hurk, B.: The impact of meteorological and hydrological memory on compound peak flows in the Rhine river basin, *Atmosphere*, 10, 171, doi:10.3390/atmos10040171, 2019.

Khanam, M., Sofia, G., Koukoulou, M., Lazin, R., Nikolopoulos, E. I., Shen, X., and Anagnostou, E. N.: Impact of compound flood event on coastal critical infrastructures considering current and future climate, *Nat. Hazards Earth Syst. Sci.*, 21, 587–605, doi:10.5194/nhess-21-587-2021, 2021.

Khatun, A., Ganguli, P., Bisht, D. S., Chatterjee, C., and Sahoo, B.: Understanding the impacts of predecessor rain events on flood hazard in a changing climate, *Hydrol. Process.*, 36, e14500, doi:10.1002/hyp.14500, 2022.

Khorshidi, M. S., Dennison, P. E., Nikoo, M. R., AghaKouchak, A., Luce, C. H., and Sadegh, M.: Increasing concurrence of wildfire drivers tripled megafire critical danger days in Southern California between 1982 and 2018, *Environ. Res. Lett.*, 15, 104002, doi:10.1088/1748-9326/abae9e, 2020.

Kirkpatrick, J. I. M., and Olbert, A. I.: Modelling the effects of climate change on urban coastal-fluvial flooding, *J. Water Clim. Change*, 11, 270–288, doi:10.2166/wcc.2020.166, 2020.

Kirono, D. G., Hennessy, K. J., and Grose, M. R.: Increasing risk of months with low rainfall and high temperature in southeast Australia for the past 150 years, *Clim. Risk Manag.*, 16, 10–21, doi:10.1016/j.crm.2017.04.001, 2017.

Kirschbaum, D., Watson, C. S., Rounce, D. R., Shugar, D. H., Kargel, J. S., Haritashya, U. K., and Jo, M.: The state of remote sensing capabilities of cascading hazards over High Mountain Asia, *Front. Earth Sci.*, 7, 197, doi:10.3389/feart.2019.00197, 2019.

Kirschbaum, D., Kapnick, S. B., Stanley, T., and Pascale, S.: Changes in extreme precipitation and landslides over High Mountain Asia, *Geophys. Res. Lett.*, 47, e2019GL085347, doi:10.1029/2019GL085347, 2020.

Klerk, W. J., Winsemius, H. C., Van Verseveld, W. J., Bakker, A. M. R., and Diermanse, F. L. M.: The co-incidence of storm surges and extreme discharges within the Rhine–Meuse Delta, *Environ. Res. Lett.*, 10, 035005, doi:10.1088/1748-9326/10/3/035005, 2015.

Kong, Q., Guerreiro, S. B., Blenkinsop, S., Li, X. F., and Fowler, H. J.: Increases in summertime concurrent drought and heatwave in Eastern China, *Weather Clim. Extrem.*, 28, 100242, doi:10.1016/j.wace.2019.100242, 2020.

Kroll, J., Denissen, J. M., Migliavacca, M., Li, W., Hildebrandt, A., and Orth, R.: Spatially varying relevance of hydrometeorological hazards for vegetation productivity extremes, *Biogeosciences*, 19, 477–489, doi:10.5194/bg-19-477-2022, 2022.



Kupfer, S., Santamaria-Aguilar, S., Van Niekerk, L., Lück-Vogel, M., and Vafeidis, A.: Investigating the interaction of waves and river discharge during compound flooding at Breede Estuary, South Africa, *Nat. Hazards Earth Syst. Sci.*, 22, 187–205, doi:10.5194/nhess-22-187-2022, 2022.

Kuroda, H., Taniuchi, Y., Kasai, H., Nakanowatari, T., and Setou, T.: Co-occurrence of marine extremes induced by tropical storms and an ocean eddy in summer 2016: Anomalous hydrographic conditions in the Pacific shelf waters off southeast Hokkaido, Japan, *Atmosphere*, 12, 888, doi:10.3390/atmos12070888, 2021.

## L

Lai, Y., Li, J., Gu, X., Liu, C., and Chen, Y. D.: Global compound floods from precipitation and storm surge: Hazards and the roles of cyclones, *J. Clim.*, 34, 8319–8339, doi:10.1175/JCLI-D-21-0050.1, 2021.

Lai, Y., Li, Q., Li, J., Zhou, Q., Zhang, X., and Wu, G.: Evolution of frequency and intensity of concurrent heavy precipitation and storm surge at the global scale: Implications for compound floods, *Front. Earth Sci.*, 9, 660359, doi:10.3389/feart.2021.660359, 2021.

Lan, M., Gardoni, P., Luo, R., Zhu, J., and Lo, S.: Risk-driven statistical modeling for hurricane-induced compound events: Design event implementation for industrial areas subjected to coastal floods and winds, *Ocean Eng.*, 251, 111159, doi:10.1016/j.oceaneng.2022.111159, 2022.

Le Grix, N., Zscheischler, J., Laufkötter, C., Rousseaux, C. S., and Frölicher, T. L.: Compound high temperature and low chlorophyll extremes in the ocean over the satellite period, *Biogeosci. Discuss.*, 1–26, doi:10.5194/bg-18-2119-2021, 2020.

Lemus-Canovas, M., and Lopez-Bustins, J. A.: Assessing internal changes in the future structure of dry–hot compound events: the case of the Pyrenees, *Nat. Hazards Earth Syst. Sci.*, 21, 1721–1738, doi:10.5194/nhess-21-1721-2021, 2021.

Leonard, M., Westra, S., Phatak, A., Lambert, M., van den Hurk, B., McInnes, K., and Stafford-Smith, M.: A compound event framework for understanding extreme impacts, *Wiley Interdiscip. Rev. Clim. Change*, 5, 113–128, doi:10.1002/wcc.252, 2014.

Lesk, C., and Anderson, W.: Decadal variability modulates trends in concurrent heat and drought over global croplands, *Environ. Res. Lett.*, 16, 055024, doi:10.1088/1748-9326/abeb35, 2021.

Li, J., Bevacqua, E., Chen, C., Wang, Z., Chen, X., Myneni, R. B., and Zscheischler, J.: Regional asymmetry in the response of global vegetation growth to springtime compound climate events, *Commun. Earth Environ.*, 3, 123, doi:10.1038/s43247-022-00455-0, 2022.

Li, J., Wang, Z., Wu, X., Zscheischler, J., Guo, S., and Chen, X.: A standardized index for assessing sub-monthly compound dry and hot conditions with application in China, *Hydrol. Earth Syst. Sci.*, 25, 1587–1601, doi:10.5194/hess-25-1587-2021, 2021.

Li, K., Wang, M., and Liu, K.: The study on compound drought and heatwave events in China using complex networks, *Sustainability*, 13, 12774, doi:10.3390/su132212774, 2021.

Li, W., Jiang, Z., Li, L. Z., Luo, J. J., and Zhai, P.: Detection and attribution of changes in summer compound hot and dry events over northeastern China with CMIP6 models, *J. Meteorol. Res.*, 36, 37–48, doi:10.1007/s13351-022-1112-8, 2022.

Li, X., You, Q., Ren, G., Wang, S., Zhang, Y., Yang, J., and Zheng, G.: Concurrent droughts and hot extremes in northwest China from 1961 to 2017, *Int. J. Climatol.*, 39, 2186–2196, doi:10.1002/joc.5944, 2019.

Liao, W., Li, D., Malyshev, S., Shevliakova, E., Zhang, H., and Liu, X.: Amplified increases of compound hot extremes over urban land in China, *Geophys. Res. Lett.*, 48, e2020GL091252, doi:10.1029/2020GL091252, 2021.

Liao, Z., Chen, Y., Li, W., and Zhai, P.: Growing threats from unprecedented sequential flood-hot extremes across China, *Geophys. Res. Lett.*, 48, e2021GL094505, doi:10.1029/2021GL094505, 2021.

Libonati, R., Geirinhas, J. L., Silva, P. S., Russo, A., Rodrigues, J. A., Belém, L. B., and Trigo, R. M.: Assessing the role of compound drought and heatwave events on unprecedented 2020 wildfires in the Pantanal, *Environ. Res. Lett.*, 17, 015005, doi:10.1088/1748-9326/ac462e, 2022.

Lionello, P., Nicholls, R. J., Umgiesser, G., and Zanchettin, D.: Venice flooding and sea level: past evolution, present issues, and future projections (introduction to the special issue), *Nat. Hazards Earth Syst. Sci.*, 21, 2633–2641, doi:10.5194/nhess-21-2633-2021, 2021.

Liu, L., Jiang, Y., Gao, J., Feng, A., Jiao, K., Wu, S., and Yan, R.: Concurrent climate extremes and impacts on ecosystems in southwest China, *Remote Sens.*, 14, 1678, doi:10.3390/rs14071678, 2022.

Liu, Q., Xu, H., and Wang, J.: Assessing tropical cyclone compound flood risk using hydrodynamic modelling: a case study in Haikou City, China, *Nat. Hazards Earth Syst. Sci. Discuss.*, 1–19, doi:10.5194/nhess-22-665-2022, 2021.

Liu, X., Luo, Y., Yang, T., Liang, K., Zhang, M., and Liu, C.: Investigation of the probability of concurrent drought events between the water source and destination regions of China's water diversion project, *Geophys. Res. Lett.*, 42, 8424–8431, doi:10.1002/2015GL065904, 2015.

Liu, Z., Cheng, L., Hao, Z., Li, J., Thorstensen, A., and Gao, H.: A framework for exploring joint effects of conditional factors on compound floods, *Water Resour. Res.*, 54, 2681–2696, doi:10.1002/2017WR021662, 2018.

Liu, Z., and Zhou, W.: The 2019 autumn hot drought over the middle-lower reaches of the Yangtze River in China: early propagation, process evolution, and concurrence, *J. Geophys. Res. Atmos.*, 126, e2020JD033742, doi:10.1029/2020JD033742, 2021.

Lu, Y., Hu, H., Li, C., and Tian, F.: Increasing compound events of extreme hot and dry days during growing seasons of wheat and maize in China, *Sci. Rep.*, 8, 16700, doi:10.1038/s41598-018-34215-y, 2018.

Luan, X., and Vico, G.: Canopy temperature and heat stress are increased by compound high air temperature and water stress and reduced by irrigation—a modeling analysis, *Hydrol. Earth Syst. Sci.*, 25, 1411–1423, doi:10.5194/hess-25-1411-2021, 2021.

Lucio, D., Tomás, A., Lara, J. L., Camus, P., and Losada, I. J.: Stochastic modeling of long-term wave climate based on weather patterns for coastal structures applications, *Coast. Eng.*, 161, 103771, doi:10.1016/j.coastaleng.2020.103771, 2020.

## M

Ma, Q., Xiong, L., Xu, C. Y., Li, R., Ji, C., and Zhang, Y.: Flood wave superposition analysis using quantitative matching patterns of peak magnitude and timing in response to climate change, *Water Resour. Manag.*, 35, 2409–2432, doi:10.1007/s11269-021-02837-z, 2021.

Manning, C., Widmann, M., Bevacqua, E., Van Loon, A. F., Maraun, D., and Vrac, M.: Soil moisture drought in Europe: a compound event of precipitation and potential evapotranspiration on multiple time scales, *J. Hydrometeorol.*, 19, 1255–1271, doi:10.1175/JHM-D-18-0017.1, 2018.

Manning, C., Widmann, M., Bevacqua, E., Van Loon, A. F., Maraun, D., and Vrac, M.: Increased probability of compound long-duration dry and hot events in Europe during summer (1950–2013), *Environ. Res. Lett.*, 14, 094006, doi:10.1088/1748-9326/ab23bf, 2019.

Marengo, J. A., Ambrizzi, T., Barreto, N., Cunha, A. P., Ramos, A. M., Skansi, M., and Salinas, R.: The heat wave of October 2020 in central South America, *Int. J. Climatol.*, 42, 2281–2298, doi:10.1002/joc.7365, 2022.

Martius, O., Pfahl, S., and Chevalier, C.: A global quantification of compound precipitation and wind extremes, *Geophys. Res. Lett.*, 43, 7709–7717, doi:10.1002/2016GL070017, 2016.

Masoomi, H., van de Lindt, J. W., Ameri, M. R., Do, T. Q., and Webb, B. M.: Combined wind-wave-surge hurricane-induced damage prediction for buildings, *J. Struct. Eng.*, 145, 04018227, doi:10.1061/(ASCE)ST.1943-541X.0002241, 2019.

Matthews, T., Wilby, R. L., and Murphy, C.: An emerging tropical cyclone–deadly heat compound hazard, *Nat. Clim. Change*, 9, 602–606, doi:10.1038/s41558-019-0525-6, 2019.

Matusick, G., Ruthrof, K. X., Kala, J., Brouwers, N. C., Breshears, D. D., and Hardy, G. E. S. J.: Chronic historical drought legacy exacerbates tree mortality and crown dieback during acute heatwave-compounded drought, *Environ. Res. Lett.*, 13, 095002, doi:10.1088/1748-9326/aad8cb, 2018.

Maung, Z., and Tustin, A. W.: The heat death line: proposed heat index alert threshold for preventing heat-related fatalities in the civilian workforce, *New Solut.*, 30, 138–145, doi:10.1177/1048291120933819, 2020.

Mavhura, E.: Analysing drivers of vulnerability to flooding: a systems approach, *S. Afr. Geogr. J.*, 101, 72–90, doi:10.1080/03736245.2018.1541020, 2019.

Meng, Y., Hao, Z., Feng, S., Zhang, X., and Hao, F.: Increase in compound dry-warm and wet-warm events under global warming in CMIP6 models, *Global Planet. Change*, 210, 103773, doi:10.1016/j.gloplacha.2022.103773, 2022.

- Merz, B., Kuhlicke, C., Kunz, M., Pittore, M., Babeyko, A., Bresch, D. N., and Wurpts, A.: Impact forecasting to support emergency management of natural hazards, *Rev. Geophys.*, 58, e2020RG000704, doi:10.1029/2020RG000704, 2020.
- Messmer, M., and Simmonds, I.: Global analysis of cyclone-induced compound precipitation and wind extreme events, *Weather Clim. Extrem.*, 32, 100324, doi:10.1016/j.wace.2021.100324, 2021.
- Messori, G., Bevacqua, E., Caballero, R., Coumou, D., De Luca, P., Faranda, D., and Zscheischler, J.: Compound climate events and extremes in the midlatitudes: Dynamics, simulation, and statistical characterization, *Bull. Am. Meteorol. Soc.*, 102, E774–E781, doi:10.1175/BAMS-D-20-0289.1, 2021.
- Ming, X., Liang, Q., Dawson, R., Xia, X., and Hou, J.: A quantitative multi-hazard risk assessment framework for compound flooding considering hazard inter-dependencies and interactions, *J. Hydrol.*, 607, 127477, doi:10.1016/j.jhydrol.2022.127477, 2022.
- Miralles, D. G., Gentile, P., Seneviratne, S. I., and Teuling, A. J.: Land–atmospheric feedbacks during droughts and heatwaves: state of the science and current challenges, *Ann. N. Y. Acad. Sci.*, 1436, 19–35, doi:10.1111/nyas.13912, 2019.
- Mishra, A., Alnahit, A., and Campbell, B.: Impact of land uses, drought, flood, wildfire, and cascading events on water quality and microbial communities: A review and analysis, *J. Hydrol.*, 596, 125707, doi:10.1016/j.jhydrol.2020.125707, 2021.
- Mishra, A., Mukherjee, S., Merz, B., Singh, V. P., Wright, D. B., Villarini, G., and Stedinger, J. R.: An overview of flood concepts, challenges, and future directions, *J. Hydrol. Eng.*, 27, 03122001, doi:10.1061/(ASCE)HE.1943-5584.0002164, 2022.
- Modrakowski, L. C., Su, J., and Nielsen, A. B.: The precautionary principles of the potential risks of compound events in Danish municipalities, *Front. Clim.*, 3, 772629, doi:10.3389/fclim.2021.772629, 2022.
- Moftakhari, H. R., Salvadori, G., AghaKouchak, A., Sanders, B. F., and Matthew, R. A.: Compounding effects of sea level rise and fluvial flooding, *Proc. Natl. Acad. Sci. U.S.A.*, 114, 9785–9790, doi:10.1073/pnas.1620325114, 2017.
- Mukherjee, S., Nateghi, R., and Hastak, M.: A multi-hazard approach to assess severe weather-induced major power outage risks in the US, *Reliab. Eng. Syst. Saf.*, 175, 283–305, doi:10.1016/j.res.2018.03.015, 2018.
- Mukherjee, S., Ashfaq, M., and Mishra, A. K.: Compound drought and heatwaves at a global scale: The role of natural climate variability-associated synoptic patterns and land-surface energy budget anomalies, *J. Geophys. Res. Atmos.*, 125, e2019JD031943, doi:10.1029/2019JD031943, 2020.
- Mulder, V. L., van Eck, C. M., Friedlingstein, P., Arrouays, D., and Regnier, P.: Controlling factors for land productivity under extreme climatic events in continental Europe and the Mediterranean Basin, *Catena*, 182, 104124, doi:10.1016/j.catena.2019.104124, 2019.
- Muñoz, D. F., Moftakhari, H., and Moradkhani, H.: Compound effects of flood drivers and wetland elevation correction on coastal flood hazard assessment, *Water Resour. Res.*, 56, e2020WR027544, doi:10.1029/2020WR027544, 2020.
- Muñoz, D. F., Abbaszadeh, P., Moftakhari, H., and Moradkhani, H.: Accounting for uncertainties in compound flood hazard assessment: The value of data assimilation, *Coast. Eng.*, 171, 104057, doi:10.1016/j.coastaleng.2021.104057, 2022.
- Muthuvel, D., and Mahesha, A.: Spatiotemporal analysis of compound agrometeorological drought and hot events in India using a standardized index, *J. Hydrol. Eng.*, 26, 04021022, doi:10.1061/(ASCE)HE.1943-5584.0002101, 2021.

## N

- Naseri, K., and Hummel, M. A.: A Bayesian copula-based nonstationary framework for compound flood risk assessment along US coastlines, *J. Hydrol.*, 610, doi:10.1016/j.jhydrol.2022.128005, 2022.
- Ning, G., Luo, M., Zhang, W., Liu, Z., Wang, S., and Gao, T.: Rising risks of compound extreme heat-precipitation events in China, *Int. J. Climatol.*, 42, 5785–5795, doi:10.1002/joc.7561, 2022.
- Nugent, A. D., Longman, R. J., Trauernicht, C., Lucas, M. P., Diaz, H. F., and Giambelluca, T. W.: Fire and rain: the legacy of Hurricane Lane in Hawai‘i, *Bull. Am. Meteorol. Soc.*, 101, E954–E967, doi:10.1175/BAMS-D-19-0104.1, 2020.

## O

- Owen, L. E., Catto, J. L., Stephenson, D. B., and Dunstone, N. J.: Compound precipitation and wind extremes over Europe and their relationship to extratropical cyclones, *Weather Clim. Extrem.*, 33, doi:10.1016/j.wace.2021.100342, 2021.

Owen, L. E., Catto, J. L., Dunstone, N. J., and Stephenson, D. B.: How well can a seasonal forecast system represent three hourly compound wind and precipitation extremes over Europe?, *Environ. Res. Lett.*, 16, 074019, doi:10.1088/1748-9326/ac092e, 2021.

## P

Paprotny, D., Voudoukas, M. I., Morales-Nápoles, O., Jonkman, S. N., and Feyen, L.: Pan-European hydrodynamic models and their ability to identify compound floods, *Nat. Hazards*, 101, 933–957, doi.org/10.1007/s11069-020-03902-3, 2020.

Park, S. J., and Lee, D. K.: Prediction of coastal flooding risk under climate change impacts in South Korea using machine learning algorithms, *Environ. Res. Lett.*, 15, 094052, doi.org/10.1088/1748-9326/aba5b3, 2020.

Parker, K., Hill, D., García-Medina, G., and Beamer, J.: The effects of changing climate on estuarine water levels: a United States Pacific Northwest case study, *Nat. Hazards Earth Syst. Sci.*, 19, 1601–1618, doi.org/10.5194/nhess-19-1601-2019, 2019.

Páscoa, P., Gouveia, C. M., Russo, A., and Silva Ribeiro, A. F.: Summer hot extremes and antecedent drought conditions in Australia, *Int. J. Climatol.*, 42, 5487–5502, doi.org/10.1002/joc.7544, 2022.

Pasquier, U., He, Y., Hooton, S., Goulden, M., and Hiscock, K. M.: An integrated 1D–2D hydraulic modelling approach to assess the sensitivity of a coastal region to compound flooding hazard under climate change, *Nat. Hazards*, 98, 915–937, doi.org/10.1007/s11069-018-3462-1, 2019.

Peduzzi, P.: The disaster risk, global change, and sustainability nexus, *Sustainability*, 11, 957, doi.org/10.3390/su11040957, 2019.

Pei, B., Pang, W., Testik, F. Y., Ravichandran, N., and Liu, F.: Mapping joint hurricane wind and surge hazards for Charleston, South Carolina, *Nat. Hazards*, 74, 375–403, doi.org/10.1007/s11069-014-1185-5, 2014.

Pescaroli, G., and Alexander, D.: Critical infrastructure, panarchies and the vulnerability paths of cascading disasters, *Nat. Hazards*, 82, 175–192, doi.org/10.1007/s11069-016-2186-3, 2016.

Pescaroli, G., and Alexander, D.: Understanding compound, interconnected, interacting, and cascading risks: a holistic framework, *Risk Anal.*, 38, 2245–2257, doi.org/10.1111/risa.13128, 2018.

Peter Sheng, Y., Paramygin, V. A., Yang, K., and Rivera-Nieves, A. A.: A sensitivity study of rising compound coastal inundation over large flood plains in a changing climate, *Sci. Rep.*, 12, 3403, doi.org/10.1038/s41598-022-07010-z, 2022.

Petroliaqkis, T. I.: Estimations of statistical dependence as joint return period modulator of compound events—Part 1: Storm surge and wave height, *Nat. Hazards Earth Syst. Sci.*, 18, 1937–1955, doi.org/10.5194/nhess-18-1937-2018, 2018.

Pfleiderer, P., Menke, I., and Schleussner, C. F.: Increasing risks of apple tree frost damage under climate change, *Clim. Change*, 157, 515–525, doi.org/10.1007/s10584-019-02570-y, 2019.

Pfleiderer, P., Jézéquel, A., Legrand, J., Legrix, N., Markantonis, I., Vignotto, E., and Yiou, P.: Simulating compound weather extremes responsible for critical crop failure with stochastic weather generators, *Earth Syst. Dynam.*, 12, 103–120, doi.org/10.5194/esd-12-103-2021, 2021.

Pietrafesa, L. J., Zhang, H., Bao, S., Gayes, P. T., and Hallstrom, J. O.: Coastal flooding and inundation and inland flooding due to downstream blocking, *J. Mar. Sci. Eng.*, 7, 336, doi.org/10.3390/jmse7100336, 2019.

Piper, D., Kunz, M., Ehmele, F., Mohr, S., Mühr, B., Kron, A., and Daniell, J.: Exceptional sequence of severe thunderstorms and related flash floods in May and June 2016 in Germany—Part 1: Meteorological background, *Nat. Hazards Earth Syst. Sci.*, 16, 2835–2850, doi.org/10.5194/nhess-16-2835-2016, 2016.

Plavcova, E., and Urban, A.: Intensified impacts on mortality due to compound winter extremes in the Czech Republic, *Sci. Total Environ.*, 746, 141033, doi:10.1016/j.scitotenv.2020.141033, 2020.

Poschlod, B., Zscheischler, J., Sillmann, J., Wood, R. R., and Ludwig, R.: Climate change effects on hydrometeorological compound events over southern Norway, *Weather Clim. Extrem.*, 28, 100253, doi.org/10.1016/j.wace.2020.100253, 2020.

Potopová, V., Cazac, V., Boincean, B., Soukup, J., and Trnka, M.: Application of hydroclimatic drought indicators in the transboundary Prut River basin, *Theor. Appl. Climatol.*, 137, 3103–3121, doi.org/10.1007/s00704-019-02789-w, 2019.

Potopová, V., Lhotka, O., Možný, M., and Musiolková, M.: Vulnerability of hop-yields due to compound drought and heat events over European key-hop regions, *Int. J. Climatol.*, 41, E2136–E2158, doi.org/10.1002/joc.6836, 2021.

Potopová, V., Türkott, L., Musiolková, M., Možný, M., and Lhotka, O.: The compound nature of soil temperature anomalies at various depths in the Czech Republic, *Theor. Appl. Climatol.*, 146, 1257–1275, doi.org/10.1007/s00704-021-03787-7, 2021.

Poulos, S., Karditsa, A., Hatzaki, M., Tsapanou, A., Papapostolou, C., and Chouvardas, K.: An insight into the factors controlling delta flood events: The case of the Evros River Deltaic Plain (NE Aegean Sea), *Water*, 14, 497, doi.org/10.3390/w14030497, 2022.

Pradhanang, S. M., Frei, A., Zion, M., Schneiderman, E. M., Steenhuis, T. S., and Pierson, D.: Rain-on-snow runoff events in New York, *Hydrol. Process.*, 27, 3035–3049, doi.org/10.1002/hyp.9864, 2013.

## Q

Qi, W., Feng, L., Yang, H., and Liu, J.: Increasing concurrent drought probability in global main crop production countries, *Geophys. Res. Lett.*, 49, doi:10.1029/2021GL097060, 2022.

Qiao, Y., Xu, W., Wu, D., Meng, C., Qin, L., Li, Z., and Zhang, X.: Changes in the spatiotemporal patterns of dry/wet abrupt alternation frequency, duration, and severity in Mainland China, 1980–2019, *Sci. Total Environ.*, 838, doi:10.1016/j.scitotenv.2022.156521, 2022.

Qiu, J., Liu, B., Yang, F., Wang, X., and He, X.: Quantitative stress test of compound coastal-fluvial floods in China's Pearl River Delta, *Earth's Future*, 10, doi:10.1029/2021EF002638, 2022.

## R

Rahimi, R., Tavakol-Davani, H., Graves, C., Gomez, A., and Fazel Valipour, M.: Compound inundation impacts of coastal climate change: Sea-level rise, groundwater rise, and coastal precipitation, *Water*, 12, 2776, doi:10.3390/w12102776, 2020.

Rajkumar, R., Shaijumon, C. S., Gopakumar, B., and Gopalakrishnan, D.: Recent patterns of extreme temperature events over Tamil Nadu, India, *Clim. Res.*, 84, 75–95, doi:10.3354/cr01655, 2021.

Raymond, C., Horton, R. M., Zscheischler, J., Martius, O., AghaKouchak, A., Balch, J., and White, K.: Understanding and managing connected extreme events, *Nat. Clim. Change*, 10, 611–621, doi:10.1038/s41558-020-0790-4, 2020.

Raymond, C., Suarez-Gutierrez, L., Kornhuber, K., Pascolini-Campbell, M., Sillmann, J., and Waliser, D. E.: Increasing spatiotemporal proximity of heat and precipitation extremes in a warming world quantified by a large model ensemble, *Environ. Res. Lett.*, 17, 035005, DOI:10.1088/1748-9326/ac5712, 2022.

Reed, D., Wang, S., Kapur, K., and Zheng, C.: Systems-based approach to interdependent electric power delivery and telecommunications infrastructure resilience subject to weather-related hazards, *J. Struct. Eng.*, 142, C4015011, DOI:10.1061/(ASCE)ST.1943-541X.0001395, 2016.

Ribeiro, A. F. S., Russo, A., Gouveia, C. M., Páscoa, P., and Zscheischler, J.: Risk of crop failure due to compound dry and hot extremes estimated with nested copulas, *Biogeosciences*, 17, 4745–4757, doi:10.5194/bg-17-4745-2020, 2020.

Ribeiro, A. F., Russo, A., Gouveia, C. M., and Pires, C. A.: Drought-related hot summers: A joint probability analysis in the Iberian Peninsula, *Weather Clim. Extrem.*, 30, 100279, doi:10.1016/j.wace.2020.100279, 2020.

Richardson, D., Black, A. S., Irving, D., Matear, R. J., Monselesan, D. P., Risbey, J. S., and Tozer, C. R.: Global increase in wildfire potential from compound fire weather and drought, *NPJ Clim. Atmos. Sci.*, 5, 23, DOI:10.1038/s41612-022-00248-4, 2022.

Ridder, N., De Vries, H., and Drijfhout, S.: The role of atmospheric rivers in compound events consisting of heavy precipitation and high storm surges along the Dutch coast, *Nat. Hazards Earth Syst. Sci.*, 18, 3311–3326, doi:10.5194/nhess-18-3311-2018, 2018.

Ridder, N. N., Pitman, A. J., Westra, S., Ukkola, A., Do, H. X., Bador, M., and Zscheischler, J.: Global hotspots for the occurrence of compound events, *Nat. Commun.*, 11, 5956, doi:10.1038/s41467-020-19639-3, 2020.

Ridder, N. N., Pitman, A. J., and Ukkola, A. M.: Do CMIP6 climate models simulate global or regional compound events skillfully?, *Geophys. Res. Lett.*, 48, e2020GL091152, doi:10.1029/2020GL091152, 2021.

Ridder, N. N., Ukkola, A. M., Pitman, A. J., and Perkins-Kirkpatrick, S. E.: Increased occurrence of high impact compound events under climate change, *NPJ Clim. Atmos. Sci.*, 5, 3, doi:10.1038/s41612-021-00224-4, 2022.

Ridder, N. N., Pitman, A. J., and Ukkola, A. M.: High impact compound events in Australia, *Weather Clim. Extrem.*, 36, 100457, doi:10.1016/j.wace.2022.100457, 2022.

Robins, P. E., Lewis, M. J., Elnahrawi, M., Lyddon, C., Dickson, N., and Coulthard, T. J.: Compound flooding: Dependence at sub-daily scales between extreme storm surge and fluvial flow, *Front. Built Environ.*, 7, 727294, doi:10.3389/fbuil.2021.727294, 2021.

Robbins, J. C.: A probabilistic approach for assessing landslide-triggering event rainfall in Papua New Guinea, using TRMM satellite precipitation estimates, *J. Hydrol.*, 541, 296–309, doi:10.1016/j.jhydrol.2016.06.052, 2016.

Röthlisberger, M., and Martius, O.: Quantifying the local effect of Northern Hemisphere atmospheric blocks on the persistence of summer hot and dry spells, *Geophys. Res. Lett.*, 46, 10101–10111, doi:10.1029/2019GL083745, 2019.

Rulfová, Z., Beranová, R., and Plavcová, E.: Compound temperature and precipitation events in the Czech Republic: differences of stratiform versus convective precipitation in station and reanalysis data, *Atmosphere*, 12, 87, doi:10.3390/atmos12010087, 2021.

Russo, A., Gouveia, C. M., Dutra, E., Soares, P. M. M., and Trigo, R. M.: The synergy between drought and extremely hot summers in the Mediterranean, *Environ. Res. Lett.*, 14, 014011, doi:10.1088/1748-9326/aaf09e, 2019.

## S

Sadegh, M., Mofkharhi, H., Gupta, H. V., Ragno, E., Mazdiyasi, O., Sanders, B., and AghaKouchak, A.: Multihazard scenarios for analysis of compound extreme events, *Geophys. Res. Lett.*, 45, 5470–5480, doi:10.1029/2018GL077317, 2018.

Samodra, G., Ngadisih, N., Malawani, M. N., et al.: Frequency–magnitude of landslides affected by the 27–29 November 2017 Tropical Cyclone Cempaka in Pacitan, East Java, *J. Mt. Sci.*, 17, 773–786, doi:10.1007/s11629-019-5734-y, 2020.

Sampurno, J., Vallaey, V., Ardianto, R., and Hanert, E.: Modeling interactions between tides, storm surges, and river discharges in the Kapuas River delta, *Biogeosciences*, 19, 2741–2757, doi:10.5194/bg-19-2741-2022, 2022.

Santos, V. M., Casas-Prat, M., Posch, B., Ragno, E., Van Den Hurk, B., Hao, Z., and Najafi, H.: Statistical modelling and climate variability of compound surge and precipitation events in a managed water system: a case study in the Netherlands, *Hydrol. Earth Syst. Sci.*, 25, 3595–3615, doi:10.5194/hess-25-3595-2021, 2021.

Sanuy, M., Rigo, T., Jiménez, J. A., and Llasat, M. C.: Classifying compound coastal storm and heavy rainfall events in the north-western Spanish Mediterranean, *Hydrol. Earth Syst. Sci.*, 25, 3759–3781, doi:10.5194/hess-25-3759-2021, 2021.

Sayol, J. M., and Marcos, M.: Assessing flood risk under sea level rise and extreme sea levels scenarios: application to the Ebro delta (Spain), *J. Geophys. Res. Oceans*, 123, 794–811, doi:10.1002/2017JC013355, 2018.

Schauberger, B., Makowski, D., Ben-Ari, T., Boé, J., and Ciais, P.: No historical evidence for increased vulnerability of French crop production to climatic hazards, *Agric. For. Meteorol.*, 306, 108453, doi:10.1016/j.agrformet.2021.108453, 2021.

Sedlmeier, K., Mieruch, S., Schädler, G., and Kottmeier, C.: Compound extremes in a changing climate – a Markov chain approach, *Nonlinear Process. Geophys.*, 23, 375–390, doi:10.5194/npg-23-375-2016, 2016.

Sedlmeier, K., Feldmann, H., and Schädler, G.: Compound summer temperature and precipitation extremes over central Europe, *Theor. Appl. Climatol.*, 131, 1493–1501, doi:10.1007/s00704-017-2061-5, 2018.

Seo, Y. W., Ha, K. J., and Park, T. W.: Feedback attribution to dry heatwaves over East Asia, *Environ. Res. Lett.*, 16, 064003, doi:10.1088/1748-9326/abf18f, 2021.

Serafin, K. A., Ruggiero, P., Parker, K., and Hill, D. F.: What’s streamflow got to do with it? A probabilistic simulation of the competing oceanographic and fluvial processes driving extreme along-river water levels, *Nat. Hazards Earth Syst. Sci.*, 19, 1415–1431, doi:10.5194/nhess-19-1415-2019, 2019.

Serinaldi, F.: Can we tell more than we can know? The limits of bivariate drought analyses in the United States, *Stoch. Environ. Res. Risk Assess.*, 30, 1691–1704, doi:10.1007/s00477-015-1124-3, 2016.

Serinaldi, F., Lombardo, F., and Kilsby, C. G.: Testing tests before testing data: an untold tale of compound events and binary dependence, *Stoch. Environ. Res. Risk Assess.*, 36, 1373–1395, doi:10.1007/s00477-022-02190-6, 2022.

Sezen, C., Šraj, M., Medved, A., and Bezak, N.: Investigation of rain-on-snow floods under climate change, *Appl. Sci.*, 10, 1242, doi:10.3390/app10041242, 2020.

Shi, W., Huang, S., Liu, D., Huang, Q., Leng, G., Wang, H., and Han, Z.: Dry and wet combination dynamics and their possible driving forces in a changing environment, *J. Hydrol.*, 589, 125211, doi:10.1016/j.jhydrol.2020.125211, 2020.

Shirzaei, M., Khoshmanesh, M., Ojha, C., Werth, S., Kerner, H., Carlson, G., and Lee, J. C.: Persistent impact of spring floods on crop loss in US Midwest, *Weather Clim. Extrem.*, 34, 100392, doi:10.1016/j.wace.2021.100392, 2021.

Sillmann, J., Shepherd, T. G., Van Den Hurk, B., Hazeleger, W., Martius, O., Slingo, J., and Zscheischler, J.: Event-based storylines to address climate risk, *Earth's Future*, 9, e2020EF001783, doi:10.1029/2020EF001783, 2021.

Singh, H., and Najafi, M. R.: Evaluation of gridded climate datasets over Canada using univariate and bivariate approaches: Implications for hydrological modelling, *J. Hydrol.*, 584, 124673, doi:10.1016/j.jhydrol.2020.124673, 2020.

Singh, H., Najafi, M. R., and Cannon, A. J.: Characterizing non-stationary compound extreme events in a changing climate based on large-ensemble climate simulations, *Clim. Dyn.*, 56, 1389–1405, doi:10.1007/s00382-020-05538-2, 2021.

Singh, J., Ashfaq, M., Skinner, C. B., Anderson, W. B., and Singh, D.: Amplified risk of spatially compounding droughts during co-occurrences of modes of natural ocean variability, *NPJ Clim. Atmos. Sci.*, 4, 7, doi:10.1038/s41612-021-00161-2, 2021.

Singh, H., Najafi, M. R., and Cannon, A.: Evaluation and joint projection of temperature and precipitation extremes across Canada based on hierarchical Bayesian modelling and large ensembles of regional climate simulations, *Weather Clim. Extrem.*, 36, 100443, doi:10.1016/j.wace.2022.100443, 2022.

Sinh, H. N., Lombardo, F. T., and Letchford, C.: Multivariate simulation for assessing the joint wind and ice hazard in the United States, *J. Wind Eng. Ind. Aerodyn.*, 184, 436–444, doi:10.1016/j.jweia.2018.12.012, 2019.

Snaiki, R., Wu, T., Whittaker, A. S., and Atkinson, J. F.: Hurricane wind and storm surge effects on coastal bridges under a changing climate, *Transp. Res. Rec.*, 2674, 23–32, doi:10.1177/036119812091767, 2020.

Song, J. Y., Alipour, A., Mofatkhari, H. R., and Moradkhani, H.: Toward a more effective hurricane hazard communication, *Environ. Res. Lett.*, 15, 064012, doi:10.1088/1748-9326/ab875f, 2020.

Steptoe, H., Jones, S. E. O., and Fox, H.: Correlations between extreme atmospheric hazards and global teleconnections: Implications for multihazard resilience, *Rev. Geophys.*, 56, 50–78, doi:10.1002/2017RG000567, 2018.

Su, Y., Kern, J. D., Reed, P. M., and Characklis, G. W.: Compound hydrometeorological extremes across multiple timescales drive volatility in California electricity market prices and emissions, *Appl. Energy*, 276, 115541, doi:10.1016/j.apenergy.2020.115541, 2020.

Sutanto, S. J., Vitolo, C., Di Napoli, C., D'Andrea, M., and Van Lanen, H. A.: Heatwaves, droughts, and fires: Exploring compound and cascading dry hazards at the pan-European scale, *Environ. Int.*, 134, 105276, doi:10.1016/j.envint.2019.105276, 2020.

Szalińska, W., Otop, I., and Tokarczyk, T.: Local urban risk assessment of dry and hot hazards for planning mitigation measures, *Clim. Risk Manag.*, 34, 100371, doi:10.1016/j.crm.2021.100371, 2021.

## T

Tang, Z., Yang, T., Lin, X., Li, X., Cao, R., and Li, W.: Future changes in the risk of compound hot and dry events over China estimated with two large ensembles, *PLOS ONE*, 17, e0264980, doi:10.1371/journal.pone.0264980, 2022.

Tanim, A. H., and Goharian, E.: Developing a hybrid modeling and multivariate analysis framework for storm surge and runoff interactions in urban coastal flooding, *J. Hydrol.*, 595, 125670, doi:10.1016/j.jhydrol.2020.125670, 2021.

Tanir, T., Sumi, S. J., de Lima, A. D. S., Coelho, G. D. A., Uzun, S., Cassalho, F., and Ferreira, C. M.: Multi-scale comparison of urban socio-economic vulnerability in the Washington, DC metropolitan region resulting from compound flooding, *Int. J. Disaster Risk Reduct.*, 61, 102362, doi:10.1016/j.ijdr.2021.102362, 2021.

Tavakol, A., Rahmani, V., and Harrington Jr, J.: Probability of compound climate extremes in a changing climate: A copula-based study of hot, dry, and windy events in the central United States, *Environ. Res. Lett.*, 15, 104058, doi:10.1088/1748-9326/abb1ef, 2020.

Tencer, B., Bettolli, M. L., and Rusticucci, M.: Compound temperature and precipitation extreme events in southern South America: associated atmospheric circulation, and simulations by a multi-RCM ensemble, *Clim. Res.*, 68, 183–199, doi:10.3354/cr01396, 2016.

Terzi, S., Torresan, S., Schneiderbauer, S., Critto, A., Zebisch, M., and Marcomini, A.: Multi-risk assessment in mountain regions: A review of modelling approaches for climate change adaptation, *J. Environ. Manage.*, 232, 759–771, doi:10.1016/j.jenvman.2018.11.100, 2019.

Thieken, A. H., Samprogna Mohor, G., Kreibich, H., and Müller, M.: Compound inland flood events: different pathways, different impacts and different coping options, *Nat. Hazards Earth Syst. Sci.*, 22, 165–185, doi:10.5194/nhess-22-165-2022, 2022.

Tilloy, A., Malamud, B. D., Winter, H., and Joly-Laugel, A.: A review of quantification methodologies for multi-hazard interrelationships, *Earth-Sci. Rev.*, 196, 102881, doi:10.1016/j.earscirev.2019.102881, 2019.

Tootoonchi, F., Sadegh, M., Haerter, J. O., Rätty, O., Grabs, T., and Teutschbein, C.: Copulas for hydroclimatic analysis: A practice-oriented overview, *WIREs Water*, 9, e1579, doi:10.1002/wat2.1579, 2022.

Tortajada, C., Koh, R., Bindal, I., and Lim, W. K.: Compounding focusing events as windows of opportunity for flood management policy transitions in Singapore, *J. Hydrol.*, 599, 126345, doi:10.1016/j.jhydrol.2021.126345, 2021.

Touma, D., Stevenson, S., Swain, D. L., Singh, D., Kalashnikov, D. A., and Huang, X.: Climate change increases risk of extreme rainfall following wildfire in the western United States, *Sci. Adv.*, 8, eabm0320, doi:10.1126/sciadv.abm0320, 2022.

Trnka, M., Semerádová, D., Novotný, I., Dumbrovský, M., Drbal, K., Pavlík, F., and Hlavinka, P.: Assessing the combined hazards of drought, soil erosion and local flooding on agricultural land: a Czech case study, *Clim. Res.*, 70, 231–249, doi:10.3354/cr01426, 2016.

Tschumi, E., Lienert, S., van Der Wiel, K., Joos, F., and Zscheischler, J.: A climate database with varying drought-heat signatures for climate impact modelling, *Geosci. Model Dev.*, 15, 387–403, doi:10.5281/zenodo.4385445, 2022.

Tuel, A., and Martius, O.: A global perspective on the sub-seasonal clustering of precipitation extremes, *Weather Clim. Extrem.*, 33, 100348, doi:10.1016/j.wace.2021.100348, 2021.

Turner, S. W., Voisin, N., Fazio, J., Hua, D., and Jourabchi, M.: Compound climate events transform electrical power shortfall risk in the Pacific Northwest, *Nat. Commun.*, 10, 8, doi:10.1038/s41467-018-07894-4, 2019.

## U

## V

van den Hurk, B., van Meijgaard, E., de Valk, P., van Heeringen, K. J., and Gooijer, J.: Analysis of a compounding surge and precipitation event in the Netherlands, *Environ. Res. Lett.*, 10, 035001, doi:10.1088/1748-9326/10/3/035001, 2015.

Vanderkelen, I., Zscheischler, J., Gudmundsson, L., Keuler, K., Rineau, F., Beenaerts, N., and Thiery, W.: A novel method for assessing climate change impacts in ecotron experiments, *Int. J. Biometeorol.*, 64, 1709–1727, doi:10.1007/s00484-020-01951-8, 2020.

van der Velde, M., Lecerf, R., d’Andrimont, R., and Ben-Ari, T.: Assessing the France 2016 extreme wheat production loss—Evaluating our operational capacity to predict complex compound events, in: *Climate Extremes and Their Implications for Impact and Risk Assessment*, edited by: Filho, W. L. and Luetz, J., Elsevier, Amsterdam, 139–158, DOI:10.1016/B978-0-12-814895-2.00009-4, 2020.

Van de Walle, J., Thiery, W., Brogli, R., Martius, O., Zscheischler, J., and van Lipzig, N. P.: Future intensification of precipitation and wind gust associated thunderstorms over Lake Victoria, *Weather Clim. Extrem.*, 34, 100391, doi:10.1016/j.wace.2021.100391, 2021.

van der Wiel, K., Lenderink, G., and de Vries, H.: Physical storylines of future European drought events like 2018 based on ensemble climate modelling, *Weather Clim. Extrem.*, 33, 100350, doi:10.1016/j.wace.2021.100350, 2021.

Vanelli, F. M., Romero Monteiro, L., Fan, F. M., and Goldenfum, J. A.: The 1974 Tubarão River flood, Brazil: reconstruction of the catastrophic flood, *J. Appl. Water Eng. Res.*, 8, 231–245, doi:10.1080/23249676.2020.1787251, 2020.



- Venäläinen, A., Lehtonen, I., Laapas, M., Ruosteenoja, K., Tikkanen, O. P., Viiri, H., and Peltola, H.: Climate change induces multiple risks to boreal forests and forestry in Finland: A literature review, *Glob. Change Biol.*, 26, 4178–4196, DOI:10.1111/gcb.15183, 2020.
- Vignotto, E., Engelke, S., and Zscheischler, J.: Clustering bivariate dependencies of compound precipitation and wind extremes over Great Britain and Ireland, *Weather Clim. Extrem.*, 32, 100318, doi:10.1016/j.wace.2021.100318, 2021.
- Villalobos-Herrera, R., Bevacqua, E., Ribeiro, A. F., Auld, G., Crocetti, L., Mircheva, B., and De Michele, C.: Towards a compound-event-oriented climate model evaluation: a decomposition of the underlying biases in multivariate fire and heat stress hazards, *Nat. Hazards Earth Syst. Sci.*, 21, 1867–1885, doi:10.5194/nhess-21-1867-2021, 2021.
- Vogel, M. M., Zscheischler, J., Wartenburger, R., Dee, D., and Seneviratne, S. I.: Concurrent 2018 hot extremes across Northern Hemisphere due to human-induced climate change, *Earth's Future*, 7, 692–703, doi:10.1029/2019EF001189, 2019.
- Vogel, M. M., Hauser, M., and Seneviratne, S. I.: Projected changes in hot, dry and wet extreme events' clusters in CMIP6 multi-model ensemble, *Environ. Res. Lett.*, 15, 094021, DOI:10.1088/1748-9326/ab90a7, 2020.
- Vogel, J., Paton, E., Aich, V., and Bronstert, A.: Increasing compound warm spells and droughts in the Mediterranean Basin, *Weather Clim. Extrem.*, 32, 100312, doi:10.1016/j.wace.2021.100312, 2021.
- Vogel, J., Rivoire, P., Deidda, C., Rahimi, L., Sauter, C. A., Tschumi, E., and Zscheischler, J.: Identifying meteorological drivers of extreme impacts: An application to simulated crop yields, *Earth Syst. Dynam. Discuss.*, 1–27, doi.org/10.5194/esd-12-151-2021, 2020.
- von Buttlar, J., Zscheischler, J., Rammig, A., Sippel, S., Reichstein, M., Knohl, A., and Mahecha, M. D.: Impacts of droughts and extreme-temperature events on gross primary production and ecosystem respiration: a systematic assessment across ecosystems and climate zones, *Biogeosciences*, 15, 1293–1318, doi:10.5194/bg-15-1293-2018, 2018.
- Vorobeuskii, I., Kronenberg, R., and Bernhofer, C.: Linking different drought types in a small catchment from a statistical perspective – Case study of the Wernersbach catchment, Germany, *J. Hydrol. X*, 15, 100122, doi:10.1016/j.hydroa.2022.100122, 2022.
- W**
- Wahl, T., Jain, S., Bender, J., Meyers, S. D., and Luther, M. E.: Increasing risk of compound flooding from storm surge and rainfall for major US cities, *Nat. Clim. Change*, 5, 1093–1097, doi:10.1038/nclimate2736, 2015.
- Wang, C., and Wang, L.: Combined effects of synoptic-scale teleconnection patterns on summer precipitation in southern China, *Atmosphere*, 9, 154, doi:10.3390/atmos9040154, 2018.
- Wang, L., Liao, S., Huang, S., Ming, B., Meng, Q., and Wang, P.: Increasing concurrent drought and heat during the summer maize season in Huang-Huai Plain, China, *Int. J. Climatol.*, 38, 3177–3190, doi:10.1002/joc.5492, 2018.
- Wang, J., Cui, Y., Choi, C. E., and Ng, C. W.: The effect of climate change on alpine mountain hazards chain: a case study in Tianmo Ravine, Tibet, China, in: *Proceedings of the 8th International Congress on Environmental Geotechnics Volume 3: Towards a Sustainable Geoenvironment*, Springer Singapore, 461–470, doi:10.1007/978-981-13-2227-3\_57, 2019.
- Wang, J., Chen, Y., Liao, W., He, G., Tett, S. F., Yan, Z., and Hu, Y.: Anthropogenic emissions and urbanization increase risk of compound hot extremes in cities, *Nat. Clim. Change*, 11, 1084–1089, doi.org/10.1038/s41558-021-01196-2, 2021.
- Wang, W., Zhang, Y., Guo, B., Ji, M., and Xu, Y.: Compound droughts and heat waves over the Huai River Basin of China: From a perspective of the magnitude index, *J. Hydrometeorol.*, 22, 3107–3119, doi:10.1175/JHM-D-20-0305.1, 2021.
- Wang, Y., and Marsooli, R.: Physical Instability of Individuals Exposed to Storm-Induced Coastal Flooding: Vulnerability of New Yorkers During Hurricane Sandy, *Water Resour. Res.*, 57, e2020WR028616, doi:10.1029/2020WR028616, 2021.
- Wang, X., Lang, X., and Jiang, D.: Detectable anthropogenic influence on summer compound hot events over China from 1965 to 2014, *Environ. Res. Lett.*, 17, 034042, DOI 10.1088/1748-9326/ac4d4e, 2022.
- Ward, P. J., Couasnon, A., Eilander, D., Haigh, I. D., Hendry, A., Muis, S., and Wahl, T.: Dependence between high sea-level and high river discharge increases flood hazard in global deltas and estuaries, *Environ. Res. Lett.*, 13, 084012, DOI 10.1088/1748-9326/aad400, 2018.

- Wazneh, H., Arain, M. A., Coulibaly, P., and Gachon, P.: Evaluating the dependence between temperature and precipitation to better estimate the risks of concurrent extreme weather events, *Adv. Meteorol.*, 2020, 8763631, doi:10.1155/2020/8763631, 2020.
- Weber, T., Bowyer, P., Rechid, D., Pfeifer, S., Raffaele, F., Remedio, A. R., and Jacob, D.: Analysis of compound climate extremes and exposed population in Africa under two different emission scenarios, *Earth's Future*, 8, e2019EF001473, doi:10.1029/2019EF001473, 2020.
- Whan, K., Zscheischler, J., Jordan, A. I., and Ziegel, J. F.: Novel multivariate quantile mapping methods for ensemble post-processing of medium-range forecasts, *Weather Clim. Extrem.*, 32, 100310, doi:10.1016/j.wace.2021.100310, 2021.
- Woo, G.: A counterfactual perspective on compound weather risk, *Weather Clim. Extrem.*, 32, 100314, doi:10.1016/j.wace.2021.100314, 2021.
- Wu, H., Su, X., Zhang, G., Feng, K., and Liang, Z.: Statistical prediction of agricultural drought severity in China based on dry or hot events, *Theor. Appl. Climatol.*, 1–13, doi.org/10.1007/s00704-021-03797-5, 2022.
- Wu, J., Yao, H., Chen, X., Wang, G., Bai, X., and Zhang, D.: A framework for assessing compound drought events from a drought propagation perspective, *J. Hydrol.*, 604, 127228, doi:10.1016/j.jhydrol.2021.127228, 2022.
- Wu, S., Wang, P., Tong, X., Tian, H., Zhao, Y., and Luo, M.: Urbanization-driven increases in summertime compound heat extremes across China, *Sci. Total Environ.*, 799, 149166, doi:10.1016/j.scitotenv.2021.149166, 2021.
- Wu, S., Chan, T. O., Zhang, W., Ning, G., Wang, P., Tong, X., and Luo, M.: Increasing compound heat and precipitation extremes elevated by urbanization in South China, *Front. Earth Sci.*, 9, 636777, doi:10.3389/feart.2021.636777, 2021.
- Wu, W., McInnes, K., O'Grady, J., Hoeke, R., Leonard, M., and Westra, S.: Mapping dependence between extreme rainfall and storm surge, *J. Geophys. Res. Oceans*, 123, 2461–2474, doi:10.1002/2017JC013472, 2018.
- Wu, X., Hao, Z., Hao, F., Singh, V. P., and Zhang, X.: Dry-hot magnitude index: A joint indicator for compound event analysis, *Environ. Res. Lett.*, 14, 064017, DOI 10.1088/1748-9326/ab1ec7, 2019.
- Wu, W., and Leonard, M.: Impact of ENSO on dependence between extreme rainfall and storm surge, *Environ. Res. Lett.*, 14, 124043, DOI 10.1088/1748-9326/ab59c2, 2019.
- Wu, X., Hao, Z., Zhang, X., Li, C., and Hao, F.: Evaluation of severity changes of compound dry and hot events in China based on a multivariate multi-index approach, *J. Hydrol.*, 583, 124580, doi:10.1016/j.jhydrol.2020.124580, 2020.
- Wu, X., Hao, Z., Tang, Q., Singh, V. P., Zhang, X., and Hao, F.: Projected increase in compound dry and hot events over global land areas, *Int. J. Climatol.*, 41, 393–403, doi.org/10.1002/joc.6626, 2021.
- Wu, X., Hao, Z., Zhang, Y., Zhang, X., and Hao, F.: Anthropogenic influence on compound dry and hot events in China based on Coupled Model Intercomparison Project Phase 6 models, *Int. J. Climatol.*, 42, 4379–4390, doi.org/10.1002/joc.7473, 2022.
- Wu, X., Hao, Z., Hao, F., Zhang, X., Singh, V. P., and Sun, C.: Influence of large-scale circulation patterns on compound dry and hot events in China, *J. Geophys. Res. Atmos.*, 126, e2020JD033918, doi:10.1029/2020JD033918, 2021.
- Wu, X., Hao, Z., Tang, Q., Zhang, X., Feng, S., and Hao, F.: Population exposure to compound dry and hot events in China under 1.5 and 2°C global warming, *Int. J. Climatol.*, 41, 5766–5775, doi.org/10.1002/joc.7152, 2021.
- Wu, Y., Miao, C., Sun, Y., AghaKouchak, A., Shen, C., and Fan, X.: Global observations and CMIP6 simulations of compound extremes of monthly temperature and precipitation, *GeoHealth*, 5, e2021GH000390, doi:10.1029/2021GH000390, 2021.
- Wu, X., and Jiang, D.: Probabilistic impacts of compound dry and hot events on global gross primary production, *Environ. Res. Lett.*, 17, 034049, DOI 10.1088/1748-9326/ac4c5b, 2022.

## X

- Xu, F., and Luo, M.: Changes of concurrent drought and heat extremes in the arid and semi-arid regions of China during 1961–2014, *Atmos. Sci. Lett.*, 20, e947, doi:10.1002/asl.947, 2019.

## Y

Yang, Y., Zhao, N., Wang, Y., and Chen, M.: Variations in summertime compound heat extremes and their connections to urbanization in China during 1980–2020, *Environ. Res. Lett.*, 17, 064024, doi:10.1088/1748-9326/ac61c5, 2022.

Ye, Y., and Fang, W.: Estimation of the compound hazard severity of tropical cyclones over coastal China during 1949–2011 with copula function, *Nat. Hazards*, 93, 887–903, doi:10.1007/s11069-018-3329-5, 2018.

Yu, R., and Zhai, P.: More frequent and widespread persistent compound drought and heat event observed in China, *Sci. Rep.*, 10, 14576, doi:10.1038/s41598-020-71312-3, 2020.

Yu, R., and Zhai, P.: Changes in compound drought and hot extreme events in summer over populated eastern China, *Weather Clim. Extrem.*, 30, 100295, doi:10.1016/j.wace.2020.100295, 2020.

Ye, B., Jiang, J., Liu, J., Zheng, Y., and Zhou, N.: Research on quantitative assessment of climate change risk at an urban scale: Review of recent progress and outlook of future direction, *Renew. Sustain. Energy Rev.*, 135, 110415, doi:10.1016/j.rser.2020.110415, 2021.

Ye, Y., and Qian, C.: Conditional attribution of climate change and atmospheric circulation contributing to the record-breaking precipitation and temperature event of summer 2020 in southern China, *Environ. Res. Lett.*, 16, 044058, doi:10.1088/1748-9326/abf8a3, 2021.

You, J., and Wang, S.: Higher probability of occurrence of hotter and shorter heat waves followed by heavy rainfall, *Geophys. Res. Lett.*, 48, e2021GL094831, doi:10.1029/2021GL094831, 2021.

## Z

Zamora-Reyes, D., Black, B., and Trouet, V.: Enhanced winter, spring, and summer hydroclimate variability across California from 1940 to 2019, *Int. J. Climatol.*, 42, 4940–4952, doi:10.1002/joc.7513, 2022.

Zhang, J., Gao, Y., Luo, K., Leung, L. R., Zhang, Y., Wang, K., and Fan, J.: Impacts of compound extreme weather events on ozone in the present and future, *Atmos. Chem. Phys.*, 18, 9861–9877, doi:10.5194/acp-18-9861-2018, 2018.

Zhang, Y., You, Q., Mao, G., Chen, C., and Ye, Z.: Short-term concurrent drought and heatwave frequency with 1.5 and 2.0°C global warming in humid subtropical basins: a case study in the Gan River Basin, China, *Clim. Dyn.*, 52, 4621–4641, doi:10.1007/s00382-018-4398-6, 2019.

Zhang, W., and Villarini, G.: Deadly compound heat stress-flooding hazard across the Central United States, *Geophys. Res. Lett.*, 47, e2020GL089185, doi:10.1029/2020GL089185, 2020.

Zhang, Y., Mao, G., Chen, C., Lu, Z., Luo, Z., and Zhou, W.: Population exposure to concurrent daytime and nighttime heatwaves in Huai River Basin, China, *Sustain. Cities Soc.*, 61, 102309, doi:10.1016/j.scs.2020.102309, 2020.

Zhang, Y., Yang, P., Gao, Y., Leung, R. L., and Bell, M. L.: Health and economic impacts of air pollution induced by weather extremes over the continental US, *Environ. Int.*, 143, 105921, doi:10.1016/j.envint.2020.105921, 2020.

Zhang, Y. J., Ye, F., Yu, H., Sun, W., Moghimi, S., Myers, E., Liu, Z., and others: Simulating compound flooding events in a hurricane, *Ocean Dyn.*, 70, 621–640, doi:10.1007/s10236-020-01351-x, 2020.

Zhang, W., Mao, W., Jiang, F., Stuecker, M. F., Jin, F. F., and Qi, L.: Tropical Indo-Pacific compounding thermal conditions drive the 2019 Australian extreme drought, *Geophys. Res. Lett.*, 48, e2020GL090323, doi:10.1029/2020GL090323, 2021.

Zhang, W., Luo, M., Gao, S., Chen, W., Hari, V., and Khouakhi, A.: Compound hydrometeorological extremes: Drivers, mechanisms and methods, *Front. Earth Sci.*, 9, 673495, doi:10.3389/feart.2021.673495, 2021.

Zhang, Y., Sun, X., and Chen, C.: Characteristics of concurrent precipitation and wind speed extremes in China, *Weather Clim. Extrem.*, 32, 100322, doi:10.1016/j.wace.2021.100322, 2021.

Zhang, Y., Yang, X., and Chen, C.: Substantial decrease in concurrent meteorological droughts and consecutive cold events in Huai River Basin, China, *Int. J. Climatol.*, 41, 6065–6083, doi:10.1002/joc.7168, 2021.

Zhang, Y., Hao, Z., Zhang, X., and Hao, F.: Anthropogenically forced increases in compound dry and hot events at the global and continental scales, *Environ. Res. Lett.*, 17, 024018, doi:10.1088/1748-9326/ac43e0, 2022.

- Zhang, Y., Hao, Z., Feng, S., Zhang, X., and Hao, F.: Changes and driving factors of compound agricultural droughts and hot events in eastern China, *Agric. Water Manag.*, 263, 107485, doi:10.1016/j.agwat.2022.107485, 2022.
- Zhang, Y., Hao, Z., Feng, S., Zhang, X., and Hao, F.: Comparisons of changes in compound dry and hot events in China based on different drought indicators, *Int. J. Climatol.*, 42, 8133–8145, doi:10.1002/joc.7698, 2022.
- Zhao, D., Lin, Y., Li, Y., and Gao, X.: An extreme heat event induced by Typhoon Lekima (2019) and its contributing factors, *J. Geophys. Res. Atmos.*, 126, e2021JD034760, doi:10.1029/2021JD034760, 2021.
- Zheng, F., Westra, S., and Sisson, S. A.: Quantifying the dependence between extreme rainfall and storm surge in the coastal zone, *J. Hydrol.*, 505, 172–187, doi:10.1016/j.jhydrol.2013.09.054, 2013.
- Zheng, F., Westra, S., Leonard, M., and Sisson, S. A.: Modeling dependence between extreme rainfall and storm surge to estimate coastal flooding risk, *Water Resour. Res.*, 50, 2050–2071, doi:10.1002/2013WR014616, 2014.
- Zhou, P., and Liu, Z.: Likelihood of concurrent climate extremes and variations over China, *Environ. Res. Lett.*, 13, 094023, doi:10.1088/1748-9326/aade9e, 2018.
- Zhou, S., Williams, A. P., Berg, A. M., Cook, B. I., Zhang, Y., Hagemann, S., and others: Land-atmosphere feedbacks exacerbate concurrent soil drought and atmospheric aridity, *Proc. Natl. Acad. Sci. U.S.A.*, 116, 18848–18853, doi:10.1073/pnas.1904955116, 2019.
- Zhou, S., Zhang, Y., Park Williams, A., and Gentile, P.: Projected increases in intensity, frequency, and terrestrial carbon costs of compound drought and aridity events, *Sci. Adv.*, 5, eaau5740, doi:10.1126/sciadv.aau5740, 2019.
- Zscheischler, J., Michalak, A. M., Schwalm, C., Mahecha, M. D., Huntzinger, D. N., Reichstein, M., and Zeng, N.: Impact of large-scale climate extremes on biospheric carbon fluxes: An intercomparison based on MsTMIP data, *Global Biogeochem. Cycles*, 28, 585–600, doi:10.1002/2014GB004826, 2014.
- Zscheischler, J., and Seneviratne, S. I.: Dependence of drivers affects risks associated with compound events, *Sci. Adv.*, 3, e1700263, doi:10.1126/sciadv.1700263, 2017.
- Zscheischler, J., Westra, S., Van Den Hurk, B. J., Seneviratne, S. I., Ward, P. J., Pitman, A., and Zhang, X.: Future climate risk from compound events, *Nat. Clim. Change*, 8, 469–477, doi:10.1038/s41558-018-0156-3, 2018.
- Zscheischler, J., Fischer, E. M., and Lange, S.: The effect of univariate bias adjustment on multivariate hazard estimates, *Earth Syst. Dynam.*, 10, 31–43, doi:10.5194/esd-10-31-2019, 2019.
- Zscheischler, J., Martius, O., Westra, S., Bevacqua, E., Raymond, C., Horton, R. M., Vignotto, E., and others: A typology of compound weather and climate events, *Nat. Rev. Earth Environ.*, 1, 333–347, doi:10.1038/s43017-020-0060-z, 2020.
- Zscheischler, J., and Fischer, E. M.: The record-breaking compound hot and dry 2018 growing season in Germany, *Weather Clim. Extrem.*, 29, 100270, doi:10.1016/j.wace.2020.100270, 2020.
- Zscheischler, J., Van Den Hurk, B., Ward, P. J., and Westra, S.: Multivariate extremes and compound events, in: *Climate Extremes and Their Implications for Impact and Risk Assessment*, Elsevier, Amsterdam, 59–76, doi:10.1016/B978-0-12-814895-2.00004-5, 2020.
- Zscheischler, J., and Lehner, F.: Attributing compound events to anthropogenic climate change, *Bull. Am. Meteorol. Soc.*, 103, E936–E953, doi:10.1175/BAMS-D-21-0116.1, 2022.
- Zscheischler, J., Naveau, P., Martius, O., Engelke, S., and Raible, C. C.: Evaluating the dependence structure of compound precipitation and wind speed extremes, *Earth Syst. Dynam.*, 12, 1–16, doi:10.5194/esd-12-1-2021, 2021.

Below is a list of hazard combinations catalogued and documented according to the Zscheischler et al. (2020) typology, organised alphabetically by typology type (Multivariate, Pre-conditioned, Spatially compounding, Temporally compounding). Under each hazard combination, a list of papers that explored the respective combination is provided.

### **Variables:**

Atmospheric pressure (Pressure); Burning Index (BI); Continuous Haines Index (CH); Convective available potential energy (CAPE); Dead fuel moisture (FM); Dew Point (DewPoint); Drought (Drought); Evaporation (Evap); Flood (Flood); Fire Weather Index (FWI); Forest Fire Danger Index (FFDI); Groundwater levels (Groundwater); Heatwaves (HW); High water acidity (HighAc); High precipitation (HighP); High pressure (HighPres); High relative humidity (HighRH); High solar radiation (HighRad); High sea level (HSL); High soil moisture (HighSM); High soil temperature (HighST); High temperatures during day (HighT); High temperatures during night (HighTnight); High wind (Wind); Landslide (Landslide); Lightning (lightning); Live fuel moisture (LFM); Low Chlorophyll (LowChl); Low precipitation (LowP); Low soil moisture (LowSM); Low soil temperature (LowST); Low solar radiation (LowRad); Low temperatures (LowT); Ozone (Ozone); Potential Evapotranspiration (PET); Precipitable water (PW); Precipitable water / extreme precipitation (PE); River discharge (RiverD); Sea surge (Surge); Sea surface temperature (SST); Snow (Snow); Standardised heat index (SHI); Standardised Precipitation Evapotranspiration Index (SPEI); Surface lift index (SLI); Surface runoff (Runoff); Tide level (Tide); Tropical cyclone (TC); Vapour pressure deficit (VPD); Wave height (Wave); Wildfire (Wildfire); Snowfall (Snow).

### **Multivariate events:**

- **CH & FFDI**

Pepler & Dowdy, 2018.

- **FFDI & Drought**

Ridder et al., 2020.

- **FFDI & HW**

Ridder et al., 2020.

- **FFDI & RiverD**

Ridder et al., 2020.

- **Flood & Wind**

English et al., 2017; Wang YF et al., 2021.

- **HighAc & LowOxy**

Gruber et al., 2021.

- **HighP & Hail**

Ridder et al., 2020.

- **HighP & Runoff**

Liu et al., 2018.

- **HighP & Surge**

Zhang et al., 2013; Zheng et al., 2014; van den Hurk et al., 2015; Wahl et al., 2015; Reed et al., 2016; Ai et al., 2018; Ridder et al., 2018; Wu et al., 2018; Bevacqua et al., 2019; Wu & Leonard, 2019; Gori et al., 2020a; Gori et al., 2020b; Ridder et al., 2020; Zhang et al., 2020; Bilskie et al., 2021; Fang et al., 2021; Khanam et al., 2021; Lai et al., 2021; Lai et al., 2021b; Santos et al., 2021; Tanim et al., 2021; Liu et al., 2022.

- **HighP & Tide**

Park & Lee, 2020.

- **HighP & Wave**

Catto & Dowdy, 2021.

- **HighP, HSL, Groundwater**

Jane et al., 2020; Rahimi et al., 2020.

- **HighP, RiverD, Surge, Wave**

Camus et al., 2021.

- **HighP, Wind, RiverD, HSL, HighSM**

Pietrafesa et al., 2019.

- **HighP, Wind, Wave**

Catto & Dowdy, 2021.

- **HighSM & FWI**

Sutanto et al., 2020.

- **HighT & Dew Point**

Whan et al., 2021.

- **HighT & Drought**

Ridder et al., 2020.

- **HighT & FWI**

Sutanto et al., 2020.

- **HighT & Hail**

Ridder et al., 2020.

- **HighT & HighP**

Zscheischler et al., 2014; Tencer et al., 2016; Zhou & Liu, 2018; Bonekamp et al., 2020; Singh & Najafi, 2020; Vogel et al., 2020; Weber et al., 2020; Aihaiti et al., 2020; Dabhi et al., 2021; Kapwata et al., 2021; Rulfova et al., 2021; Singh et al., 2021a; Wu et al., 2021d; Ye & Qian, 2021; Das et al., 2022; Kroll et al., 2022; Meng et al., 2022; Ning et al., 2022; Singh et al., 2022.

- **HighT & HighRH**

Zscheischler et al., 2019; Maung & Tustin, 2020; Garry et al., 2021; Villalobos-Herrera et al., 2021.

- **HighT & HW**

Ridder et al., 2020.

- **HighT & LowChl**

Le Grix et al., 2021.

- **HighT & LowP**

Zscheischler et al., 2014; Serinaldi, 2016; Sedlmeier et al., 2016; Kirono et al., 2017; Zscheischler & Seneviratne, 2017; Flach et al., 2018; Hao et al., 2018; Lu et al., 2018; Sedlmeier et al., 2018; Wang, et al., 2018; Zhou & Liu, 2018; Hao et al., 2019a; Feng et al., 2019; Hao et al., 2019b; Li et al., 2019; Manning et al., 2019; Mulder et al., 2019; Wu et al., 2019; Xu & Luo et al., 2019; Bezak & Mikos, 2020; De Luca et al., 2020b; Feng et al., 2020; Hao, Z et al., 2020; Hao, Y et al., 2020; Kong et al., 2020; Ribeiro et al., 2020a; Ribeiro et al., 2020b; Ridder et al., 2020; Singh & Najafi, 2020; Vogel et al., 2020; Wazneh et al., 2020; Weber et al., 2020; Wu et al., 2020a; Wu et al., 2020b; Zscheischler et al., 2020b; Aihaiti et al., 2021; Ballarin et al., 2021; Brunner et al., 2021; Collins, 2021; Dabhi et al., 2021; Feng et al., 2021b; Geirinhas et al., 2021; Hao et al., 2021a; hao et al., 2021b; Ionita & Nagavciuc, 2021; Lemus-Canovas et al., 2021; Li et al., 2021a; Li et al., 2021b; Liu & Zhou, 2021; Seo et al., 2021; Singh et al., 2021a; Szalinska et al., 2021; Tschumi et al., 2021; Vogel et al., 2021a; Wang WJ et al., 2021; Wu XY et al., 2021a; Wu XY et al., 2021b; Wu XY et al., 2021c; Wu et al., 2021d; Zscheischler & Lehner, 2021; Bevacqua et al., 2022; Chiang et al., 2022; Das et al., 2022; Kroll et al., 2022; Li et al., 2022; Li et al., 2022b; Liu et al., 2022; Libonati et al., 2022; Meng et al., 2022; Ridder et al., 2022a; Tang et al., 2022; Tootoonchi et al., 2022; Wu & Jiang et al., 2022; Zhang et al., 2022; Ridder et al., 2022b, Zhang et al., 2022b; Singh et al., 2022.

- **HighT & LowSM**

von Buttlar et al., 2018; Cheng et al., 2019; Sutanto et al., 2020; Ermitao et al., 2021; Hamed et al., 2021; Luan & Vico, 2021; Jiang et al., 2022; Zhang et al., 2022.

- **HighT & Ozone**

Herig et al., 2020; Jahn & Hertig, 2022; Zhang et al., 2020; Ban et al., 2022.

- **HighT, LowP & Pressure**

Rothlisberger & Martius, 2019; Gao et al., 2020.

- **HighT, LowP & VPD**

Vogel et al., 2021b; Gazol & Camarero, 2022.

- **HighT, LowP, LowSM**

Muthuvel & Mahesha, 2021; Guo et al., 2022; Chen et al., 2019; Mukherjee et al., 2020; Yu & Zhai, 2020; Yu & Zhai, 2020b; Wu et al., 2022.

- **HighT, RH & Wind**

Tavakol et al., 2020.

- **HSL & HighP**

Bengtsson, 2016; Grip et al., 2021; Sanuy et al., 2021; Naseri & Hummel, 2022.

- **HSL & RiverD**

Moftakhari et al., 2017; Ward et al., 2018; Ganguli & Merz, 2019; Ganguli & Merz, 2019b; Pasquier et al., 2019; Serafin et al., 2019; Munoz et al., 2020; Bevacqua et al., 2021a; Fan et al., 2021; Ghanbari et al., 2021.

- **HW & Drought**

Ridder et al., 2020.

- **HW & Hail**

Ridder et al., 2020.



- **HW & LowP**

Ridder et al., 2020.

- **LFM, Wind, SHI, FM, ERC, BI, VPD**

Khorshidi et al., 2020.

- **LowP & PET**

Manning et al., 2018.

- **LowSM & FWI**

Sutanto et al., 2020.

- **LowSM, HighT & FWI**

Sutanto et al., 2020.

- **LowT & HighP**

Zscheischler et al., 2014; Sedlmeier et al., 2016; Tencer et al., 2016; Zhou & Liu, 2018; Wazneh et al., 2020; De Luca et al., 2020b; Singh & Najafi, 2020; Dabhi et al., 2021; Wu et al., 2021d; Kroll et al., 2022.

- **LowT & LowP**

Zscheischler et al., 2014; Zhou & Liu, 2018; Singh & Najafi, 2020; Dabhi et al., 2021; Wu et al., 2021; Zhang, YQ et al., 2021b; Kroll et al., 2022; Li et al., 2022.

- **LowT & Snow**

D'Errico et al., 2022.

- **PW & PE**

Alaya et al., 2020.

- **RiverD & HighP**

Apel et al., 2016; Ridder et al., 2020.

- **RiverD & Surge**

Klerk et al., 2015; Bevacqua et al., 2017; Couasnon et al., 2018; Herdman et al., 2018; Hendry et al., 2019; Khanal et al., 2019; Couasnon et al., 2020; Eilander et al., 2020; Ganguli et al., 2020; Gori et al., 2020; Kirkpatrick & Olbert, 2020; Ridder et al., 2020; Dykstra & Dzwonkowski, 2021; Harrison et al., 2021; Robins et al., 2021; Camus et al., 2022; Jane et al., 2022.

- **RiverD & Wave**

Kupfer et al., 2022.

- **RiverD & Wind**

Ridder et al., 2020.

- **RiverD & HighT**

Turner et al., 2019.

- **Surge & Wave**

Petroliagkis, 2018; Sayol & Marcos, 2018; Lucio et al., 2020; Ridder et al., 2020; Housego et al., 2021.

- **Surge, Wave, HighP**

Bevacqua et al., 2020.

- **Surge, Wave, Tide, RiverD**

Fakhruddin et al., 2022; Sampurno et al., 2022; Qiu et al., 2022.

- **Surge/HSL, RiverD & HighP**

Gori et al., 2020; Paprotny et al., 2020; Tanir et al., 2021; Munoz et al., 2022.

- **TC and HSL**

Sheng et al., 2022.

- **VPD & LowSM**

Zhou et al., 2019a; Zhou et al., 2019.

- **Wave, Surge, HSL**

Anderson et al., 2019.

- **Wind & Drought**

Ridder et al., 2020.

- **Wind & Hail**

Ridder et al., 2020.

- **Wind & HighP**

Martius et al., 2016; Ye & Fang, 2018; Hillier & Dixon, 2020; Ridder et al., 2020; Catto & Dowdy, 2021; Henin et al., 2020; Song et al., 2020; Messmer & Simmonds, 2021; Owen et al., 2021a; Owen et al., 2021b; Ridder et al., 2021; Van de Walle et al., 2021; Vignotto et al., 2021; Zhang, YQ et al., 2021a; Zscheischler et al., 2021; Poulos et al., 2022; Ridder et al., 2022a; Ridder et al., 2022.

- **Wind & Surge**

Pei et al., 2014; Baradaranshoraka et al., 2017; Ridder et al., 2020; Snaiki et al., 2020; Lan et al., 2022.

- **Wind & Wave**

Catto & Dowdy, 2021.

- **Wind, Pressure, Runoff, Wave, HSL**

Parker et al., 2019.

- **Wind, Surge, HighP**

Alipour et al., 2022.

- **Wind, Wave, Surge**

Masoomi et al., 2019.

### **Pre-conditioned events:**

- **HighP on HighSM**

Poschlod et al., 2020; Camici et al., 2019; Khanal et al., 2019; Khatun et al., 2022.

- **HighT, HighRad, Evap, LowP- to LowSM**

Bevacqua et al., 2021.

- **HighT then High SST**

Dzwonkowski et al., 2021

- **HighT then LowT**

Pfleiderer et al., 2019.

- **Rain on Snow**

Pradhanang et al., 2013; Poschlod et al., 2020; Sezen et al., 2020; Shirzaei et al., 2021.

#### **Spatially compounding events:**

- **HighP & HighP**

De Michele et al., 2020; Bevacqua et al., 2021.

- **HighT and HighT**

Vogel et al., 2019.

#### **LowP and HighP**

De Luca et al., 2020a; De Michele et al, 2020.

- **LowP & LowP**

Liu et al., 2015; De Michele et al., 2020; Singh et al., 2021b; Zscheischler & Lehner, 2021.

- **RiverD & River D**

De Luca et al., 2017; Berghuijs et al., 2019; Deidda et al., 2021; Ma et al., 2021.

- **SPEI and SEPI**

Qi et al., 2022.

- **TC and TC**

Curtis et al., 2021.

#### **Temporally compounding events:**

- **Cyclone clusters (Cyclone-Cyclone)**

Bevacqua et al., 2020.

- **HighP then HighP**

Robbins, 2016; Shi et al., 2020; Vanelli et al., 2020; Bevacqua et al., 2021a; Tuel & Martius, 2021; Fish et al., 2022; Raymond et al., 2022.

- **HighP then HighT**

Chen et al., 2021; Liao Z et al., 2021.

- **HighP then Landslide**

Kirschbaum et al., 2020; Samodra et al., 2020.

- **HighP then LowP**

He & Sheffield et al., 2020; Shi et al., 2020.

- **HighT then HightnightT**

Chen et al., 2019; Zhang et al., 2020; Liao WL et al., 2021; Marengo et al., 2021; Rajkumar et al., 2021; Wang J et al., 2021; Wu, SJ et al., 2021a; Wang et al., 2022; Yang et al., 2022.

- **HighT then HighP**

Tencer et al., 2016; Weber et al., 2020; Wu SJ et al., 2021; You & Wang, 2021; Das et al., 2022.

- **HighT then HighT**

Baldwin et al., 2019; Raymond et al., 2022.

- **HighT then LowP**

Weber et al., 2020; Das et al., 2022.

- **LowP then HighP**

Shi et al., 2020; Vogel et al., 2020; Weber et al., 2020; Mishra et al., 2021; Das et al., 2022; Hoover et al., 2022; Raymond et al., 2022; Zamora-Reyes et al., 2022; Qiao et al., 2022.

- **LowP then HighT**

Pascoa et al., 2022.

- **LowP then LowP**

Shi et al., 2020.

- **TC then HighT**

Matthews et al., 2019; Zhao et al., 2021.

- **TC then TC (x6)**

Kuroda et al., 2021.

### **Combinations of typologies:**

#### **Preconditioned / Temporally compounding events:**

- **Drought then HighT**

Russo et al., 2019.

- **HighT then High SPEI then LowSM**

Zhang et al., 2019.

- **HighT then RiverD**

Gu et al., 2022.

- **HighST then LowST.**

Potopova et al., 2021.

- **LowP then LowSM**

Zhang et al., 2019; Vorobeuskii et al., 2022.

- **LowSM then HighP**

Trnka et al., 2016.

- **LowT then LowP**

Druckenbrod et al., 2019.

- **RiverD then HighT**

Gu et al., 2022.

- **Warm autumn (HighT), wet spring (HighT then HighP)**

Ben-Ari et al., 2018; Pfliegerer et al., 2021.

- **Wildfire then HighP**

Jacobs et al., 2016; Moftakhari & AghaKouchak, 2019; Kemter et al., 2021; Touma et al., 2022.

**Multivariate / Temporally compounding events:**

- **Drought and Drought**

Wu et al., 2022.

- **Flood then HighT & HighRH**

Zhang & Villarini, 2020.

- **HighT and HighRad then LowP and High SPEI**

Van den Wiel et al., 2021.

- **HighT & LowP then HighP**

Vogel et al., 2020.

- **HighP, Lightning, SLI, CAPE (sequence thunderstorms)**

Piper et al., 2016.

**Warm autumn (HighT), HighT & HighP spring**

Van der Velde., 2020.

**Pre-conditioned / Multivariate events:**

- **LowP then FFDI (HighT, RH, Wind)**

Richardson et al., 2022.

- **LowSM then HighT/LowP**

Matusick et al., 2018; Flach et al., 2021.

- **LowSM and HighT, LowRH, LowP, Pressure**

El Madany et al., 2020.

**Temporally / Pre-conditioned / Multivariate events:**

- **HighT & LowP consecutive years**

Bastos et al., 2020.

- **Hydrological drought and range of other conditions (HighP, HighT, RH, Wind, ET)**

Potopova et al., 2019.

- **Warm spring (HighT) then LowSM/HighT**

Bastos et al., 2020.

**Spatially compounding / Multivariate events:**

- **FWI and FWI**

Abatzoglou et al., 2020.



- **HighP & Wind -LowP & Wind**

Nugent et al., 2020.

- **HighT & LowP (global crops)**

Feng & Hao, 2020; Potopova et al., 2020; Bevacqua et al., 2021a; Feng et al., 2021a; Feng et al., 2021c; Lesk et al., 2021; He et al., 2021; He et al., 2022.
