# Supplementary material for: Review article: The growth in compound weather events research in the decade since SREX
Source: Copernicus journal article supplement (doi:10.5194/nhess-2024-182), 2024-09-25
Supplement: Supplementary file [file nhess-2024-182-AC1-supplement.pdf]

Dear Reviewer RC1,

Thank you for your constructive feedback and positive remarks. We are grateful for your detailed comments and agree that addressing these points will enhance the paper.

Here, we outline how we will revise the manuscript accordingly:

- We will clarify the distinction between compound events and multi-hazards, providing a more in-depth discussion on how compound events research concentrates on the analysis of hydrometeorological hazards, along with the associated exposure and vulnerability to these hazards, as opposed to broader geophysical or biological hazards.
- We are also happy to provide more detail regarding the purpose of the 55 'Other' papers, explaining why they are included. The 'Other' relevant research encompassed in this review includes the development of compound event frameworks, the conceptualisation of compound events within wider risk frameworks, and examples of compound weather and climate events within our conceptual analysis.
- We will address the four technical corrections highlighted by RC1 to clarify our findings (lines 121-122, 122-123, 213, and 227).

We value your perspectives and are confident that these adjustments will enhance the manuscript. Thank you once more for your time and expertise.

Best regards,

Lou (on behalf of the manuscript authorship team)

16<sup>th</sup> March, 2025
